# Supplementary material for: Total synthesis of (29S,37S)-isomer of malevamide E, a potent ion-channel inhibitor
Source: Royal Society of Chemistry journal article supplement (doi:10.1039/c2ob26533h), 2012-10-03
Supplement: c2ob26533h.pdf [file c2ob26533h.pdf]

## Supporting Information

### Total synthesis of (29*S*,37*S*)-isomer of malevamide E, a potent ion-channel inhibitor

Praveen Kumar Gajula<sup>a</sup>, Shrikant Sharma<sup>b</sup>, Ravi Sankar Ampapathi<sup>b</sup> and Tushar Kanti Chakraborty<sup>a\*</sup>

<sup>a</sup>*CSIR-Central Drug Research Institute, Lucknow – 226001, India*

<sup>b</sup>*NMR center, SAIF, CSIR-Central Drug Research Institute, Lucknow – 226001, India*

*chakraborty@cdri.res.in*

#### Table of Contents:

1. Experimental procedures and data for the compounds: **6,10,12-14,16,17,18,20,21,23,24**.
2. Spectra (<sup>1</sup>H and <sup>13</sup>C NMR) of compounds: **1,6,10,12-14,16-18,20,21,23-25**.
3. Chemical Shift tables and Spectral expansions for compounds **20, 21, 24, 25** and **1**.

**General Experimental Procedures.** All reactions were carried out in oven or flame-dried glassware with magnetic stirring under nitrogen atmosphere using dry, freshly distilled solvents, unless otherwise noted. Reactions were monitored by thin layer chromatography (TLC) carried out on 0.25 mm silica gel plates with UV light, I<sub>2</sub>, 7% ethanolic phosphomolybdic acid-heat and 2.5% ethanolic anisaldehyde (with 1% AcOH and 3.3% conc. H<sub>2</sub>SO<sub>4</sub>)-heat as developing agents. Silica gel finer than 200 mesh was used for flash column chromatography. Yields refer to chromatographically and spectroscopically homogeneous materials unless otherwise stated. Melting points are uncorrected.

Optical rotations were measured using Autopol III manufactured by Rudolph using sodium (589, D line) lamp and are reported as follows:  $[\alpha]_D^{25}$  ( $c = \text{g}/100 \text{ ml}$ , solvent). MALDI-TOF was recorded on ABSciex ToF spectrometer. Analytical HPLC analyses were performed on a Merck Hitachi HPLC system equipped with a 5  $\mu$  Thermo C-8 column (250  $\times$  4.6 mm) and a UV/vis detector setting of  $\lambda = 254 \text{ nm}$ .

IR spectra were recorded as neat liquids or KBr pellets. Mass spectra were obtained under electron impact ionisation (EI), liquid secondary ion mass spectrometric (LSIMS) technique, electron spray ionisation (ESI) and MALDI techniques. Optical rotations were measured with a digital polarimeter.

NMR spectra were recorded on 600, 400, 300 and 200 MHz spectrometers at 30 °C with 2-10 mM solutions in appropriate solvents using TMS as internal standard or the solvent signals as secondary standards and the chemical shifts are shown in  $\delta$  scales. Multiplicities of NMR signals are designated as s (singlet), d (doublet), t (triplet), q (quartet), br (broad), m (multiplet, for unresolved lines), etc. <sup>13</sup>C NMR spectra were recorded on 100, 75 and 50 MHz spectrometers with complete proton decoupling.

**Compound 10:**

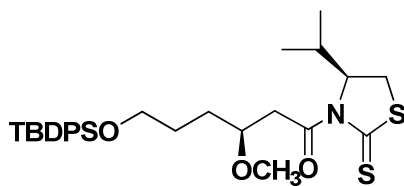

**10**

A solution of thione **9** (2.18 gm, 10.74 mmol) in 100 mL CH<sub>2</sub>Cl<sub>2</sub> was cooled to 0 °C. Neat TiCl<sub>4</sub> (1.25 mL, 11.81 mmol) was added dropwise and the resulting slurry was stirred for 5 min. The reaction was then cooled to -78 °C and *i*-Pr<sub>2</sub>NEt (2.06 mL, 11.81 mmol) in 2 mL of CH<sub>2</sub>Cl<sub>2</sub> was added dropwise. The resulting dark red solution was warmed to -40 °C and stirred for 2 h. After 2 h, the reaction was cooled to -78 °C and freshly distilled, neat SnCl<sub>4</sub> (0.63 mL, 5.37 mmol) was added dropwise, followed by the addition of acetal **8** (2.0 gm, 5.37 mmol) in 3 mL CH<sub>2</sub>Cl<sub>2</sub>. After addition was complete, the reaction was allowed to stir at -78 °C for an additional 15 min, and then transferred into a -20 °C bath where it was allowed to stir for 2 h. The reaction was then quenched by the addition of a saturated aqueous NH<sub>4</sub>Cl solution. The layers were separated and the aqueous layer was then extracted into CH<sub>2</sub>Cl<sub>2</sub> (2 x 50 mL). The organic extracts were dried (Na<sub>2</sub>SO<sub>4</sub>) and evaporated to give a crude yellow oil which was purified by flash chromatography (8% EtOAc/hexanes to 10% EtOAc /hexanes) to afford the product **10** (1.57 gm, 54%) as a yellow oil along with the other isomer. *R<sub>f</sub>* = 0.3 (SiO<sub>2</sub>, 15% EtOAc in petroleum ether); specific rotation [*α*]<sub>D</sub><sup>25</sup> = 94.1 (*c* 1.2, CHCl<sub>3</sub>); IR (neat): *v*<sub>max</sub> 3749, 3180, 2932, 2862, 2361, 1704, 1466, 1217, 1103, 768, 705 cm<sup>-1</sup>; <sup>1</sup>H NMR (300 MHz, CDCl<sub>3</sub>): δ 7.78-7.61 (m, 4H), 7.50-7.35 (m, 6H), 5.14 (t, *J* = 7.2 Hz, 1H), 3.85 (m, 1H), 3.76-3.66 (m, 2H), 3.60-3.41 (m, 2H), 3.35 (m, 1H), 3.34 (s, 3H), 3.02 (m, 1H), 2.40 (m, 1H), 1.75-1.56 (m, 4H), 1.15-0.93 (m, 15H); <sup>13</sup>C NMR (50 MHz, CDCl<sub>3</sub>): δ 201.80, 131.75, 135.48, 133.85, 129.49, 127.56, 71.64, 69.93, 63.69, 56.87, 43.10, 35.92, 31.98, 30.78, 30.58, 29.42, 27.91, 26.79, 19.12, 19.03, 18.74, 18.19, 17.70; MS (ESIMS): *m/z* (%): 544 (90) [M + H]<sup>+</sup>; HRMS (ESIMS): calcd for C<sub>29</sub>H<sub>42</sub>NO<sub>3</sub>S<sub>2</sub>Si [M + H]<sup>+</sup>: 544.2375, found: 544.2372.

**Compound 12:**

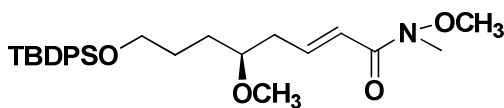

**12**

Compound **10** (1.10 g, 2.0 mmol) was taken in dry CH<sub>2</sub>Cl<sub>2</sub> (6 mL), cooled to -78 °C and DIBAL-H (4.0 mL, 1 M in toluene, 4.0 mmol) was added portion-wise and stirred at that temperature for 15 min. The reaction was then quenched by slow addition of dry methanol and brought to room temperature. Saturated aqueous potassium-sodium tartrate solution was added to the reaction mixture and stirred (~ 2 h) until two clear layers got separated. Solvent was evaporated under reduced pressure and the aqueous layer was extracted with EtOAc. The organic layer was washed with H<sub>2</sub>O, brine, dried (Na<sub>2</sub>SO<sub>4</sub>) and concentrated in *vacuo*. The aldehyde thus obtained by flash chromatography (745 mg, 96%) was directly used in the next step without further characterization.

To a solution of aldehyde (745 mg, 1.94 mmol) in dry THF (3 mL) at  $-78\text{ }^{\circ}\text{C}$  was added NaH (79 mg, 1.98 mmol) in portion wise followed by *N*-methyl diethylphosphoacetamide (**11**) (0.41 mL, 1.98 mmol), and slowly the reaction mixture was brought to  $-40\text{ }^{\circ}\text{C}$  and allowed to stir at the same temperature for 1 h. The reaction was then quenched by slow addition of  $\text{NH}_4\text{Cl}$  solution (5 mL). THF was removed under reduced pressure and the product was extracted from aqueous layer with EtOAc (2 x 50 mL). The combined organic layer was washed with brine (10 mL), dried ( $\text{Na}_2\text{SO}_4$ ), filtered and concentrated in *vacuo*. Purification by column chromatography ( $\text{SiO}_2$ , 30% EtOAc in petroleum ether eluant) afforded the Wenreb amide **12** (702 mg, 78%) as colorless oil.  $R_f = 0.3$  ( $\text{SiO}_2$ , 40% EtOAc in petroleum ether); specific rotation  $[\alpha]_{\text{D}}^{25} = 13.4$  (*c* 0.24,  $\text{CHCl}_3$ ); IR (neat):  $\nu_{\text{max}}$  3415, 2355, 1634, 1381, 1218, 1103, 769, 703  $\text{cm}^{-1}$ ;  $^1\text{H}$  NMR (300 MHz,  $\text{CDCl}_3$ ):  $\delta$  7.75-7.60 (m, 4H), 7.49-7.33 (m, 4H), 6.98 (m, 1H), 6.47 (d,  $J = 15.56$  Hz, 1H), 3.76-3.62 (m, 5H), 3.69 (s, 3H), 3.33 (s, 3H), 3.29 (m, 1H), 3.25 (s, 3H), 2.51-2.31 (m, 2H) 1.70-1.52 (m, 4H), 1.07 (s, 9H);  $^{13}\text{C}$  NMR (50 MHz,  $\text{CDCl}_3$ ):  $\delta$  166.68, 143.88, 135.56, 133.99, 129.54, 127.61, 120.76, 79.70, 63.85, 61.66, 56.73, 36.91, 32.35, 29.90, 28.14, 26.87, 19.20; MS (ESIMS):  $m/z$  (%): 470 (100)  $[\text{M} + \text{H}]^+$ ; HRMS (ESIMS): calcd for  $\text{C}_{27}\text{H}_{40}\text{NO}_4\text{Si}$   $[\text{M} + \text{H}]^+$ : 470.2724, found: 470.2715.

### Compound 13:

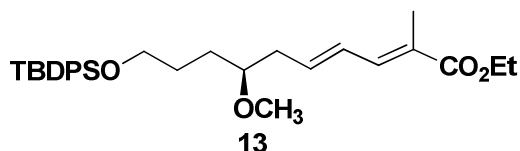

Compound **12** (650 mg, 1.38 mmol) was taken in dry THF (4 mL), cooled to  $-78\text{ }^{\circ}\text{C}$  and DIBAL-H (4.15 mL, 1.0 M in toluene, 4.15 mmol) was added portion-wise and stirred at that temperature for 15 min. The reaction was then quenched by slow addition of dry methanol and brought to room temperature. Saturated aqueous potassium-sodium tartrate solution was added to the reaction mixture and stirred ( $\sim 2$  h) until two clear layers got separated. Solvent was evaporated under reduced pressure and the aqueous layer was extracted with EtOAc. The organic layer was washed with  $\text{H}_2\text{O}$ , brine, dried ( $\text{Na}_2\text{SO}_4$ ) and concentrated *vacuo*. The aldehyde thus obtained by flash chromatography (550 mg, 97%) was directly used in the next step without further characterization.

To a solution of aldehyde obtained above (550 mg, 1.34 mmol) in dry benzene (4 mL) was added (1-ethoxycarbonylethylidene)-triphenylphosphorane (971 mg, 2.68 mmol) at room temperature. The mixture was stirred for 4 h at reflux conditions. It was then concentrated in *vacuo*. Purification by column chromatography ( $\text{SiO}_2$ , 10% EtOAc/hexanes to 15% EtOAc /hexanes eluant) furnished **13** (530 mg, 80%) as a colorless liquid.  $R_f = 0.3$  ( $\text{SiO}_2$ , 20% EtOAc in petroleum ether); specific rotation  $[\alpha]_{\text{D}}^{25} = 24.97$  (*c* 0.38,  $\text{CHCl}_3$ ); IR (neat):  $\nu_{\text{max}}$  3441, 2933, 2359, 1700, 1360, 1219, 1104, 769, 704  $\text{cm}^{-1}$ ;  $^1\text{H}$  NMR (300 MHz,  $\text{CDCl}_3$ ):  $\delta$  7.77-7.61 (m, 4H), 7.50-7.33 (m, 6H), 7.20 (m, 1H), 6.41 (dd,  $J = 15.34$  Hz, 11.16 Hz, 1H), 6.08 (m, 1H), 4.23 (q,  $J = 7.01$  Hz, 2H), 3.77-3.63 (m, 2H), 3.34 (s, 3H), 3.28 (m, 1H), 2.40 (t,  $J = 6.83$  Hz, 2H), 1.95 (s, 3H), 1.73-1.49 (m, 4H), 1.32 (t,  $J = 7.01$  Hz, 1H), 1.07 (s, 9H);  $^{13}\text{C}$  NMR (50 MHz,  $\text{CDCl}_3$ ):  $\delta$  168.61, 138.57, 138.24, 135.57, 133.97, 129.57, 128.08, 127.62, 125.63, 80.12, 63.82, 60.49, 56.67, 37.34, 29.75, 28.18, 26.87, 19.22, 14.35, 12.63; MS

(ESIMS):  $m/z$  (%): 517 (100) [M + Na HRMS (ESIMS): calcd for  $C_{30}H_{42}O_4SiNa$  [M + Na]<sup>+</sup>: 517.2750, found: 517.2798.

**Compound 14:**

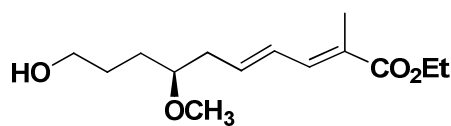

To a solution of **13** (500 mg, 1.01 mmol) in dry THF (3 mL), TBAF (1M in THF, 2.02 mL, 2.02 mmol) was added at 0 °C, the reaction mixture was warmed to room temperature and stirred for 1 h. It was quenched with saturated aqueous  $NH_4Cl$  solution, extracted with EtOAc, washed with brine, dried ( $Na_2SO_4$ ) and concentrated in *vacuo*. Purification by column chromatography ( $SiO_2$ , 25 to 30% EtOAc in petroleum ether eluant) afforded compound **14** (220 mg, 85%) as a clear oil.  $R_f$  = 0.3 ( $SiO_2$ , 30% EtOAc in petroleum ether); specific rotation  $[\alpha]_D^{25} = 48.3$  ( $c$  0.12,  $CHCl_3$ ); IR (neat):  $\nu_{max}$  3422, 2931, 2359, 1707, 1373, 1221, 1095, 770, 676  $cm^{-1}$ ;  $^1H$  NMR (300 MHz,  $CDCl_3$ ):  $\delta$  7.18 (m, 1H), 6.42 (dd,  $J = 15.27, 11.81$  Hz, 1H), 6.07 (m, 1H), 4.22 (q,  $J = 7.11$  Hz, 2H), 3.71-3.60 (m, 2H), 3.39 (s, 3H), 3.33 (m, 1H), 2.53-2.34 (m, 2H) 1.95 (s, 3H), 1.76-1.51 (m, 5H), 1.31 (t,  $J = 7.11$  Hz, 3H);  $^{13}C$  NMR (50 MHz,  $CDCl_3$ ):  $\delta$  168.57, 138.04, 128.25, 125.86, 80.38, 62.85, 60.50, 56.72, 37.08, 30.32, 28.60, 14.30, 12.59; MS (ESIMS):  $m/z$  (%): 279 (80) [M + Na]<sup>+</sup>; HRMS (ESIMS): calcd for  $C_{14}H_{24}O_4Na$  [M + Na]<sup>+</sup>: 279.1572, found: 279.1586.

**Compound 16:**

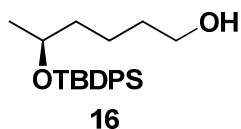

BMS (0.561 mL, 5.91 mmol) was added to olefin **15** (1.0 gm, 2.95 mmol) in anhydrous THF (15 mL). The resulting solution was stirred at room temperature for 6 h. Basic workup: To the reaction solution were added 12 mL of EtOH/THF (1:1) and then 12 mL of  $H_2O_2$  (30% aq), and the resulting mixture was stirred at room temperature for 4h and extracted by ethyl acetate (EtOAc). The combined organic layers were washed with water, brine, dried over  $Na_2SO_4$ , filtered, and concentrated in *vacuo*. Purification on silica gel (15 to 20% EtOAc in petroleum ether eluant) gave 842 mg of **16** in 80% yield.  $R_f$  = 0.3 ( $SiO_2$ , 20% EtOAc in petroleum ether); specific rotation  $[\alpha]_D^{25} = -6.8$  ( $c$  2.52,  $CHCl_3$ ); IR (neat):  $\nu_{max}$  3477, 3402, 2934, 2861, 1725, 1590, 1466, 1218, 1109, 764, 704  $cm^{-1}$ ;  $^1H$  NMR (300 MHz,  $CDCl_3$ ):  $\delta$  7.81-7.59 (m, 4H), 7.48-7.26 (m, 6H), 3.85 (m, 1H), 3.50 (t,  $J = 6.82$  Hz, 2H), 1.60-1.22 (m, 6H), 1.18-0.91 (m, 12H);  $^{13}C$  NMR (50 MHz,  $CDCl_3$ ):  $\delta$  135.93, 134.89, 129.55, 127.55, 69.50, 62.82, 39.16, 32.16, 32.68, 27.12, 23.25, 21.39, 19.32; MS (ESIMS):  $m/z$  (%): 357 (100) [M + H]<sup>+</sup>; HRMS (ESIMS): calcd for  $C_{22}H_{24}O_2Si$  [M + H]<sup>+</sup>: 357.2250, found: 357.2268.

### Compound 6:

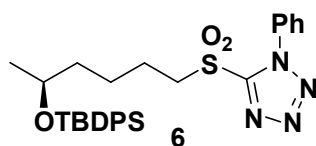

Triphenylphosphine (884 mg, 3.37 mmol), 1-phenyl-1*H*-tetrazole-5-thiol (PT-SH, 600 mg, 3.37 mmol) and **16** (800 mg, 2.24 mmol) were dissolved in anhydrous THF (22 mL), to which was added DIAD (0.66 g, 3.37 mmol) at room temperature. After being stirred for 0.5 h, the reaction mixture was diluted with EtOH (25 mL) and cooled to 0 °C. In a separate flask were mixed 30% aqueous H<sub>2</sub>O<sub>2</sub> (5.09 mL, 44.80 mmol) and ammonium molybdate (554 mg, 0.45 mmol), producing a bright yellow solution that was added to the reaction via pipette. After being stirred overnight at room temperature, the reaction mixture was diluted by the addition of water and CH<sub>2</sub>Cl<sub>2</sub>. The layers were separated and the aqueous layer was extracted three times with CH<sub>2</sub>Cl<sub>2</sub>. The combined organic layers were washed with water and brine, dried over Na<sub>2</sub>SO<sub>4</sub>, filtered, and concentrated in vacuo. Purification on silica gel (15 to 20% EtOAc in petroleum ether eluant) provided 1.04 g (85% yield) of **6** as colorless oil. *R*<sub>f</sub> = 0.3 (SiO<sub>2</sub>, 10% EtOAc in petroleum ether); specific rotation [α]<sub>D</sub><sup>25</sup> = -14.4 (*c* 3.04, CHCl<sub>3</sub>); IR (neat): ν<sub>max</sub> 3848, 2936, 2860, 1724, 1594, 1344, 1149, 1107, 760, 702 cm<sup>-1</sup>; <sup>1</sup>H NMR (300 MHz, CDCl<sub>3</sub>): δ 7.85-7.58 (m, 8H), 7.54-7.34 (m, 7H), 3.92 (m, 1H), 3.73-3.56 (m, 2H), 1.97-1.79 (m, 2H), 1.65-1.40 (m, 4H), 1.22-0.96 (m, 12H); <sup>13</sup>C NMR (50 MHz, CDCl<sub>3</sub>): δ 153.30, 135.69, 134.64, 134.38, 134.14, 132.89, 131.25, 129.51, 129.41, 127.46, 127.33, 124.91, 68.70, 55.72, 38.24, 26.89, 23.57, 23.03, 21.79, 19.09; MS (ESIMS): *m/z* (%): 549 (100) [M + H]<sup>+</sup>; HRMS (ESIMS): calcd for C<sub>29</sub>H<sub>37</sub>N<sub>4</sub>O<sub>3</sub>SSi [M + H]<sup>+</sup>: 549.2356, found: 549.2348.

### Compound 17:

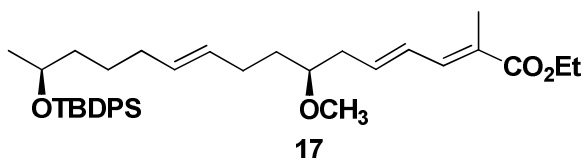

To a solution of compound **14** (200 mg, 0.78 mmol) in dry CH<sub>2</sub>Cl<sub>2</sub> (2.0 mL) was added, with stirring, DMSO (1.6 mL), Et<sub>3</sub>N (0.54 mL, 3.90 mmol) and SO<sub>3</sub>-Py complex (622 mg, 3.90 mmol) portion wise at 0°C under nitrogen atmosphere. After 1h of stirring at 0°C, the reaction was quenched with saturated aqueous NH<sub>4</sub>Cl (5 mL) and extracted with EtOAc (2 x 50 mL). The combined organic extracts were washed with saturated aqueous NH<sub>4</sub>Cl (10 mL), water (10 mL), brine (10 mL), dried (Na<sub>2</sub>SO<sub>4</sub>), and concentrated in *vacuo*. The aldehyde **7** (*R*<sub>f</sub> = 0.55, 15% EtOAc in petroleum ether) thus obtained by flash chromatography (190 mg, 96%) was directly used in the next reaction.

To a solution of sulfone **6** (615 mg, 1.12 mmol) in 4 mL of THF/HMPA (4:1 v/v) was added LiHMDS (1 M in THF, 0.75 mL, 0.75 mmol) at -78 °C. After the mixture was stirred for 15 min, a solution of the aldehyde **7** (190 mg, 0.75 mmol) in 1 mL of THF/HMPA (4:1 v/v) obtained above was added dropwise. The reaction was stirred at -78 °C for 3 h. Saturated NH<sub>4</sub>Cl (aq) was added. The mixture was then extracted with EtOAc (3 x 50 mL). The combined organic layers were washed with brine, dried over Na<sub>2</sub>SO<sub>4</sub>, filtered and concentrated under reduced pressure. The residue was purified by flash column chromatography (4 to 6%

EtOAc in petroleum ether eluant) to afford a mixture of two geometrical isomers **17** (310 mg, 72% yield, *E/Z* 13 based on  $^1\text{H}$  NMR):  $R_f = 0.3$  (SiO<sub>2</sub>, 10% EtOAc in petroleum ether). Specific rotation  $[\alpha]_D^{25} = -9.4$  (*c* 2.46, CHCl<sub>3</sub>); IR (neat):  $\nu_{\text{max}}$  3620, 3404, 2929, 2360, 1704, 1365, 1219, 1105, 769, 702 cm<sup>-1</sup>;  $^1\text{H}$  NMR (300 MHz, CDCl<sub>3</sub>):  $\delta$  7.76-7.57 (m, 4H), 7.46-7.31 (m, 6H), 7.19 (m, 1H), 6.41 (dd, *J* = 15.33, 11.38 Hz, 1H), 6.08 (m, 1H), 5.42-5.25 (m, 2H), 4.21 (q, *J* = 7.15 Hz, 2H), 3.93-3.78 (m, 2H), 3.61 (m, 1H), 3.35 (s, 3H) 3.26 (m, 1H), 2.40 (t, *J* = 6.55 Hz, 2H), 2.12-1.77 (m, 8H), 1.94 (s, 3H), 1.58-1.21 (m, 9H), 1.06 (s, 9H);  $^{13}\text{C}$  NMR (75 MHz, CDCl<sub>3</sub>):  $\delta$  168.59, 138.56, 135.88, 134.81, 131.44, 129.71, 129.37, 127.60, 127.45, 127.38, 125.08, 79.80, 69.50, 68.86, 60.48, 56.77, 55.93, 38.95, 38.95, 38.42, 37.31, 33.65, 32.52, 29.70, 28.37, 27.05, 25.15, 23.76, 23.18, 19.28, 14.33, 12.60; MS (ESIMS): *m/z* (%): 578 (100) [M + 2H]<sup>+</sup>; HRMS (ESIMS): calcd for C<sub>36</sub>H<sub>54</sub>O<sub>4</sub>Si [M + 2H]<sup>+</sup>: 578.3791, found: 578.3767.

### Compound 18:

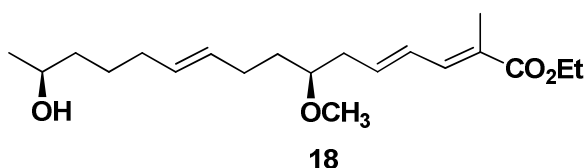

To a solution of **17** (250 mg, 0.43 mmol) in dry DMF (3.0 mL), TBAF (1M in THF, 2.17 mL, 2.17 mmol) was added at room temperature, followed by AcOH (0.12 mL, 2.17 mmol) and H<sub>2</sub>O (0.19 mL, 10.75 mmol). The reaction mixture was warmed to 50 °C and stirred for 12 h. It was quenched with saturated aqueous NH<sub>4</sub>Cl solution, extracted with EtOAc, washed with brine, dried (Na<sub>2</sub>SO<sub>4</sub>) and concentrated in *vacuo*. Purification by column chromatography (SiO<sub>2</sub>, 15 to 20% EtOAc in petroleum ether eluant) afforded compound **18** (125 mg, 85%) as a clear oil.  $R_f = 0.3$  (SiO<sub>2</sub>, 20% EtOAc in petroleum ether); specific rotation  $[\alpha]_D^{25} = -2.0$  (*c* 0.15, CHCl<sub>3</sub>); IR (neat):  $\nu_{\text{max}}$  3416, 2364, 1635, 1426, 1220, 771 cm<sup>-1</sup>;  $^1\text{H}$  NMR (300 MHz, CDCl<sub>3</sub>):  $\delta$  7.18 (m, 1H), 6.41 (dd, *J* = 15.10, 11.33 Hz, 1H), 6.08 (m, 1H), 5.41 (m, 2H), 4.21 (q, *J* = 7.06 Hz, 2H), 3.81 (m, 1H), 3.36 (s, 3H), 3.27 (m, 1H) 2.47-2.32 (m, 2H), 2.15-1.98 (m, 5H), 1.94 (s, 3H), 1.62-1.14 (m, 11H);  $^{13}\text{C}$  NMR (75 MHz, CDCl<sub>3</sub>):  $\delta$  168.63, 138.48, 134.79, 130.51, 129.97, 128.08, 125.66, 79.81, 68.05, 60.49, 56.75, 38.77, 37.27, 33.62, 32.46, 28.35, 27.09, 23.50, 14.30, 12.58; MS (ESIMS): *m/z* (%): 339 (100) [M + H]<sup>+</sup>; HRMS (ESIMS): calcd for C<sub>20</sub>H<sub>35</sub>O<sub>4</sub> [M + H]<sup>+</sup>: 339.2535, found: 339.2523.

### Compound 20:

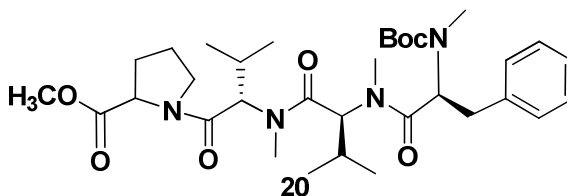

Silver oxide (1.20 g, 5.22 mmol) was added portion wise to a stirred solution of compound **19** (500 mg, 0.87 mmol) in DMF (3 mL) at 0 °C under nitrogen atmosphere. After the addition was completed, the reaction mixture was stirred at 0 °C for 5 min. Then MeI (0.33 mL, 5.22 mmol) was added slowly to the stirred reaction mixture. The reaction mixture was warmed to room temperature and stirred for 12 h. It was then diluted with EtOAc, extracted with EtOAc, washed with brine, dried (Na<sub>2</sub>SO<sub>4</sub>) and concentrated in *vacuo*. Purification by

column chromatography (SiO<sub>2</sub>, 50% to 60% EtOAc in petroleum ether eluant) afforded compound **20** (443 mg, 72%) as colorless oil.  $R_f = 0.3$  (SiO<sub>2</sub>, 60% EtOAc in petroleum ether); specific rotation  $[\alpha]_D^{25} = -3.9$  ( $c$  0.10, CHCl<sub>3</sub>); IR (neat):  $\nu_{\max}$  3507, 3247, 3022, 2698, 1638, 1461, 1217, 769, 670 cm<sup>-1</sup>; <sup>1</sup>H NMR (400 MHz, CDCl<sub>3</sub>) for chemical shifts of four isomers see Tables 1a-1d; <sup>13</sup>C NMR (50 MHz, CDCl<sub>3</sub>, a mixture of rotamers):  $\delta$  172.47, 170.20, 169.67, 168.38, 155.46, 137.95, 129.40, 128.29, 126.40, 58.89, 58.37, 57.47, 55.02, 52.08, 46.99, 35.53, 31.88, 30.02, 29.65, 29.27, 28.13, 27.90, 26.92, 25.98, 24.71, 19.85, 19.39, 18.97, 18.03; MS (ESIMS):  $m/z$  (%): 639 (100) [M + Na]<sup>+</sup>; HRMS (ESIMS): calcd for C<sub>37</sub>H<sub>52</sub>N<sub>4</sub>O<sub>7</sub>Na [M + Na]<sup>+</sup>: 639.3734, found: 639.3737.

### Compound 23:

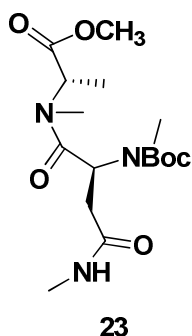

Silver oxide (811 mg, 3.50 mmol) was added portion wise to a stirred solution of compound **21** (300 mg, 0.95 mmol) in DMF (3 mL) at 0 °C under nitrogen atmosphere. After the addition was completed, the reaction mixture was stirred at 0 °C for 5 min. Then MeI (0.22 mL, 3.50 mmol) was added slowly to the stirred reaction mixture. The reaction mixture was warmed to room temperature and stirred for 12 h. The reaction mixture was diluted with EtOAc, extracted with EtOAc, washed with brine, dried (Na<sub>2</sub>SO<sub>4</sub>) and concentrated in *vacuo*. Purification by column chromatography (SiO<sub>2</sub>, 80% to 90% EtOAc in petroleum ether eluant) afforded compound **23** (230 mg, 68%) as colorless oil.  $R_f = 0.3$  (SiO<sub>2</sub>, EtOAc); specific rotation  $[\alpha]_D^{25} = -28.6$  ( $c$  0.05, CHCl<sub>3</sub>); IR (neat):  $\nu_{\max}$  3449, 3375, 2863, 1668, 1540, 1158, 1056, 758 cm<sup>-1</sup>; <sup>1</sup>H NMR (300 MHz, CDCl<sub>3</sub>, a mixture of rotamers):  $\delta$  6.15 (m, 1H), 5.51-5.20 (m, 1H), 4.84 (m, 1H), 3.70 (s, 3H), 3.13-2.55 (m, 10H), 2.38 (m, 1H), 1.64-1.33 (m, 12H); <sup>13</sup>C NMR (50 MHz, CDCl<sub>3</sub>, a mixture of rotamers):  $\delta$  172.48, 171.67, 170.48, 155.30, 54.32, 52.25, 35.79, 32.28, 29.65, 28.26, 26.28, 15.98; MS (ESIMS):  $m/z$  (%): 382 (100) [M + H]<sup>+</sup>; HRMS (ESIMS): calcd for C<sub>16</sub>H<sub>29</sub>N<sub>3</sub>O<sub>6</sub>Na [M + Na]<sup>+</sup>: 382.1954, found: 382.1960.

### Compound 21:

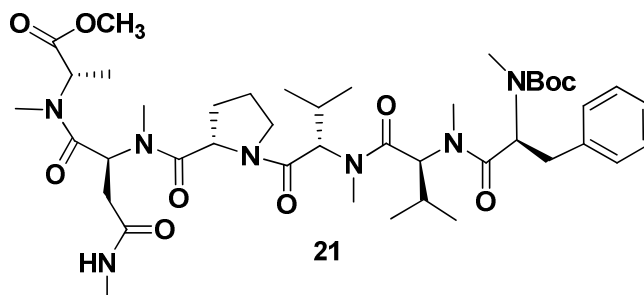





The Boc-D-Val-OH (52 mg, 0.23 mmol) was dissolved in CH<sub>2</sub>Cl<sub>2</sub> (3 mL) and cooled to 0 °C. Then to it was added BOP-Cl (86 mg, 0.34 mmol). After 10 minute, Boc-protected TFA salt of **21** prepared above, and dissolved in CH<sub>2</sub>Cl<sub>2</sub> (1 mL), was added to the reaction mixture followed by the addition of DIPEA (0.2 mL, 1.13 mmol). After stirring for 12 h at room temperature, the reaction mixture was diluted with CHCl<sub>3</sub>, washed with saturated NH<sub>4</sub>Cl solution, 1N HCl, saturated NaHCO<sub>3</sub> solution, water, brine, dried (Na<sub>2</sub>SO<sub>4</sub>), filtered and concentrated in *vacuo*. Purification by column chromatography (silica gel, 2% to 3% MeOH in CHCl<sub>3</sub> as eluant) afforded the **24** (167 mg, 79%) as white solid.  $R_f = 0.3$  (SiO<sub>2</sub>, 5% MeOH in CHCl<sub>3</sub>, a mixture of rotamers); specific rotation  $[\alpha]_D^{25} = -39.8$  ( $c$  0.23, CHCl<sub>3</sub>); IR (neat):  $\nu_{\max}$  3434, 2967, 2374, 1636, 1450, 1220, 1017, 771, 670 cm<sup>-1</sup>; <sup>1</sup>H NMR (100 MHz, CDCl<sub>3</sub>): For major conformation chemical shifts, see Table 3; <sup>13</sup>C NMR (100 MHz, CDCl<sub>3</sub>, a mixture of rotamers):  $\delta$  173.17, 172.24, 171.61, 170.15, 170.09, 169.85, 169.71, 168.28, 155.96, 137.55, 129.45, 129.13, 128.99, 128.48, 126.95, 126.60, 79.81, 60.24, 60.05, 59.01, 58.78, 58.16, 56.74, 55.56, 55.21, 53.55, 53.27, 52.22, 51.13, 47.34, 35.76, 35.60, 32.74, 31.91, 30.75, 30.61, 30.11, 29.78, 29.58, 29.42, 27.04, 26.44, 26.01, 24.93, 22.76, 19.99, 19.89, 19.31, 18.44, 18.02, 16.95, 14.19, 14.10; MS (ESIMS):  $m/z$  (%): 965 (100) [M + Na]<sup>+</sup>; HRMS (ESIMS): calcd for C<sub>48</sub>H<sub>79</sub>N<sub>8</sub>O<sub>11</sub> [M + H]<sup>+</sup>: 943.5868, found: 943.5876.

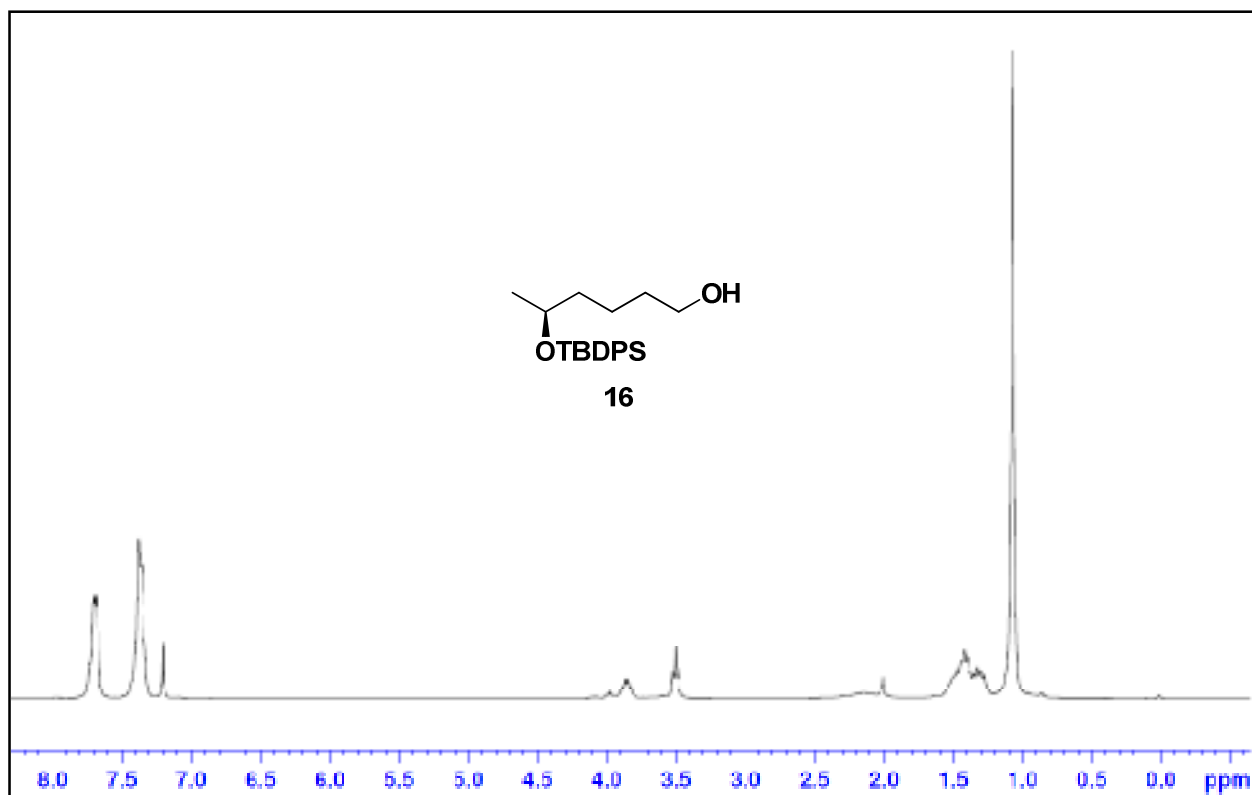

<sup>1</sup>H Spectrum of compound **16** in CDCl<sub>3</sub> (300 MHz)

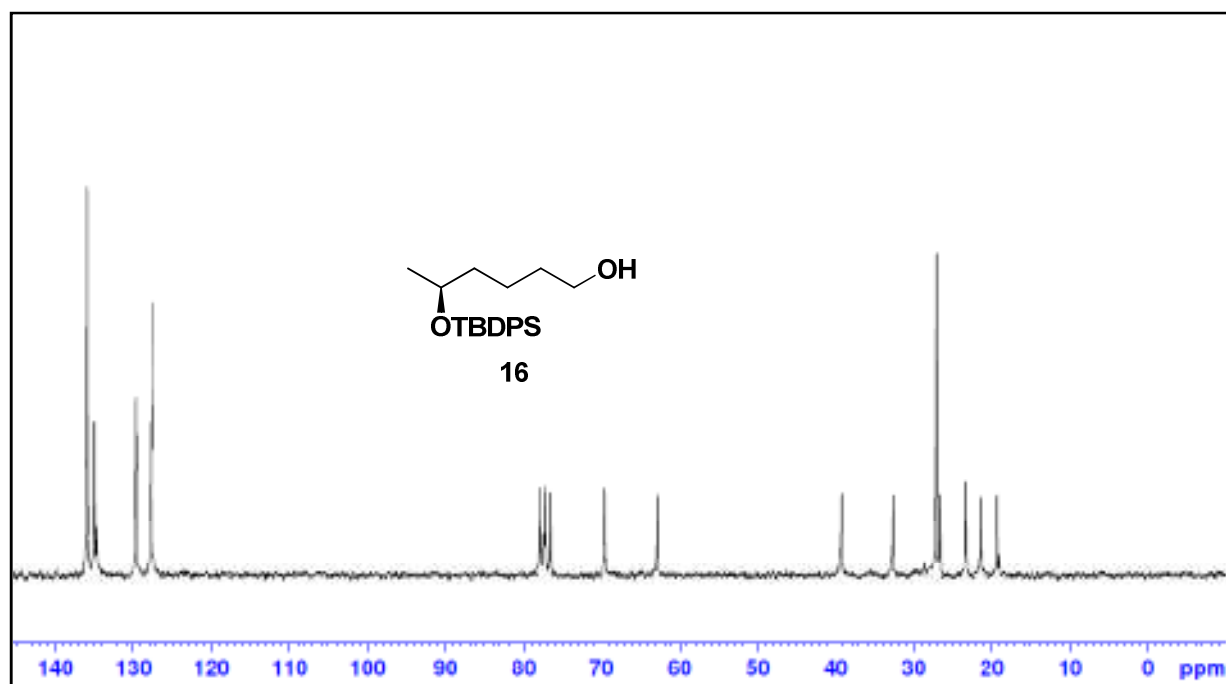

<sup>13</sup>C Spectrum of compound **16** in CDCl<sub>3</sub> (50 MHz)

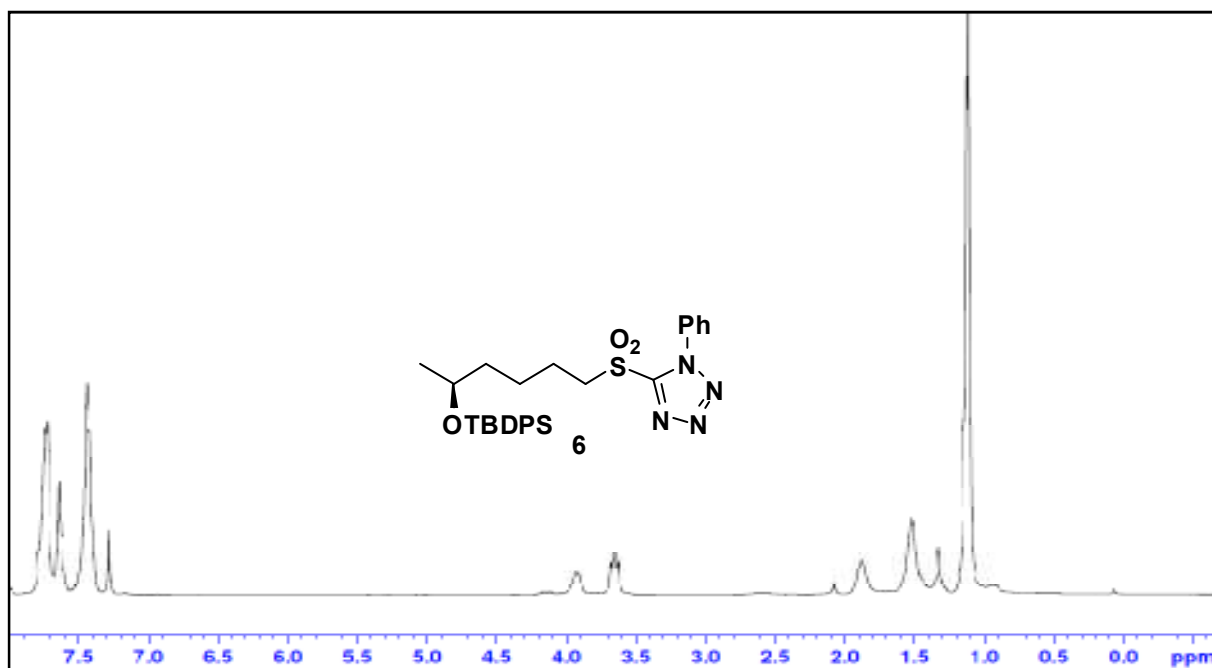

<sup>1</sup>H Spectrum of compound **6** in CDCl<sub>3</sub> (300 MHz)

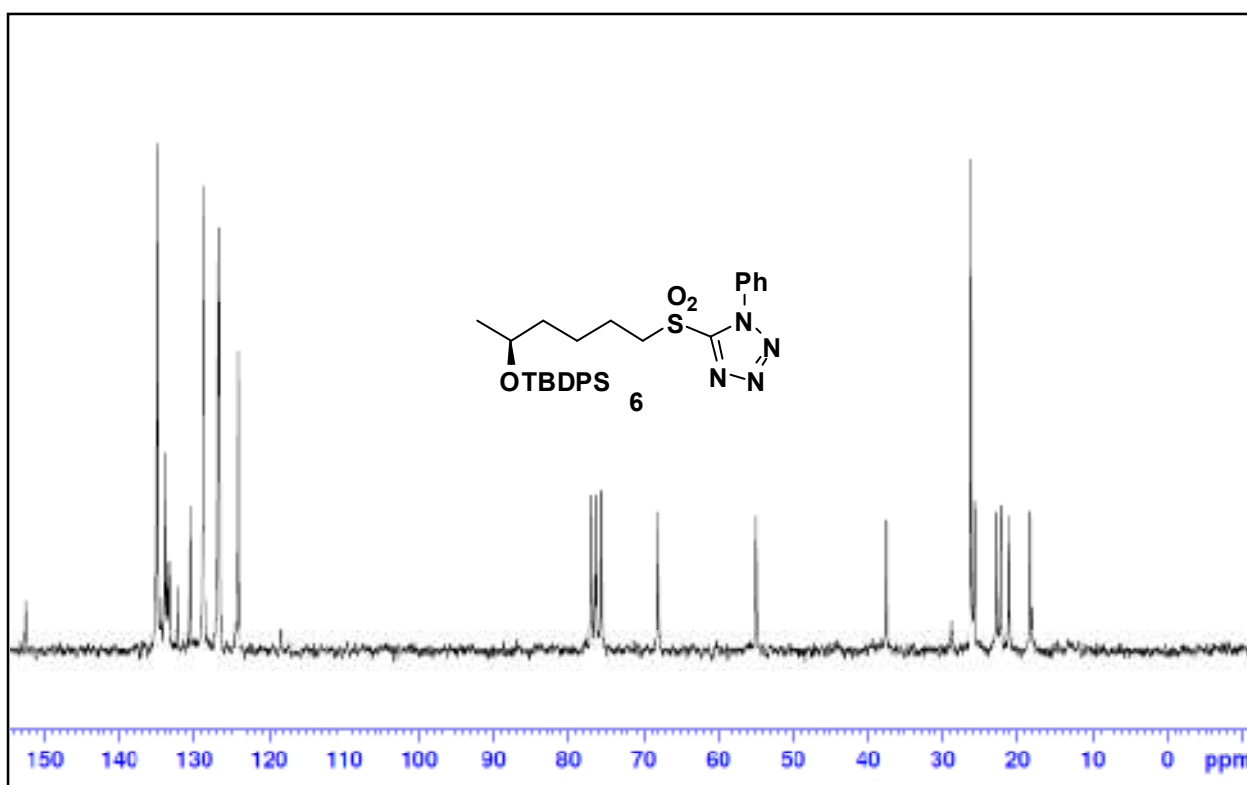

<sup>13</sup>C Spectrum of compound **6** in CDCl<sub>3</sub> (50 MHz)

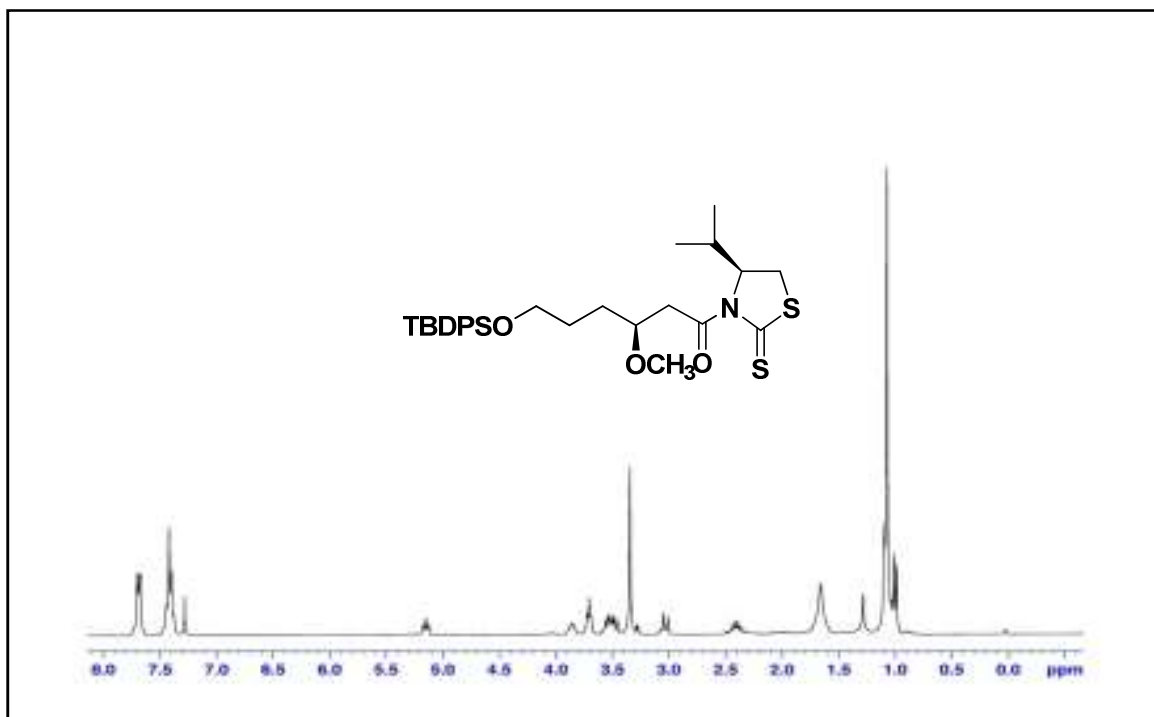

$^1\text{H}$  Spectrum of compound **10** in  $\text{CDCl}_3$  (300 MHz)

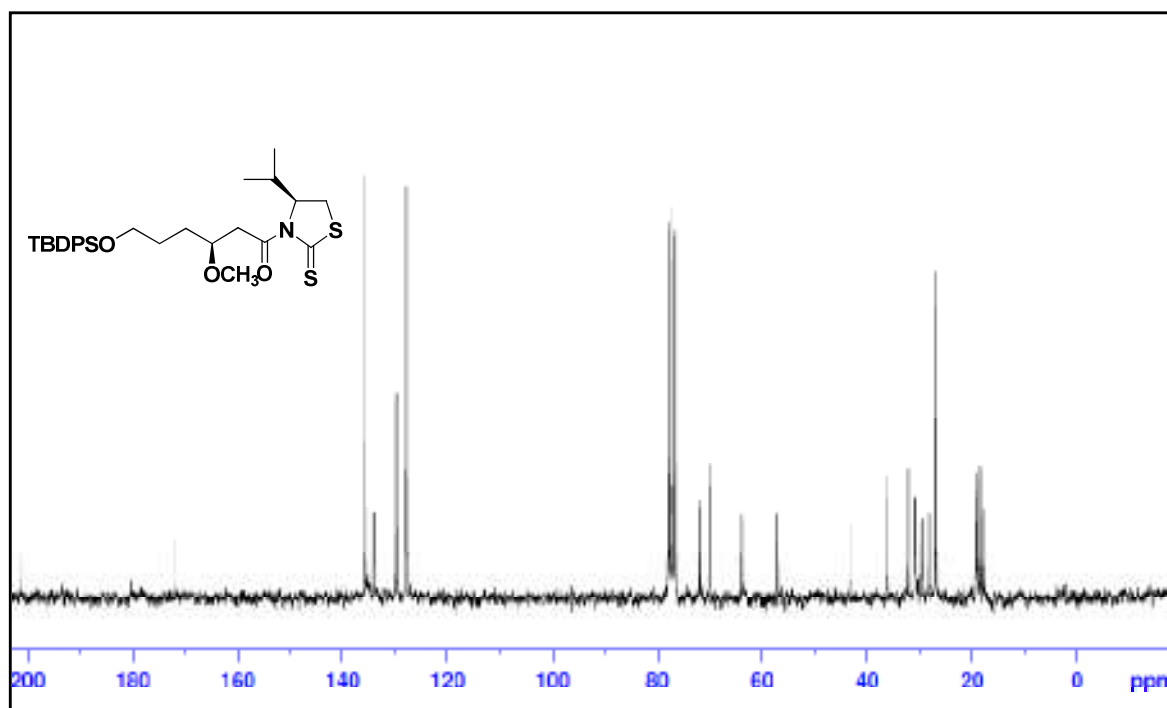

$^{13}\text{C}$  Spectrum of compound **10** in  $\text{CDCl}_3$  (50 MHz)

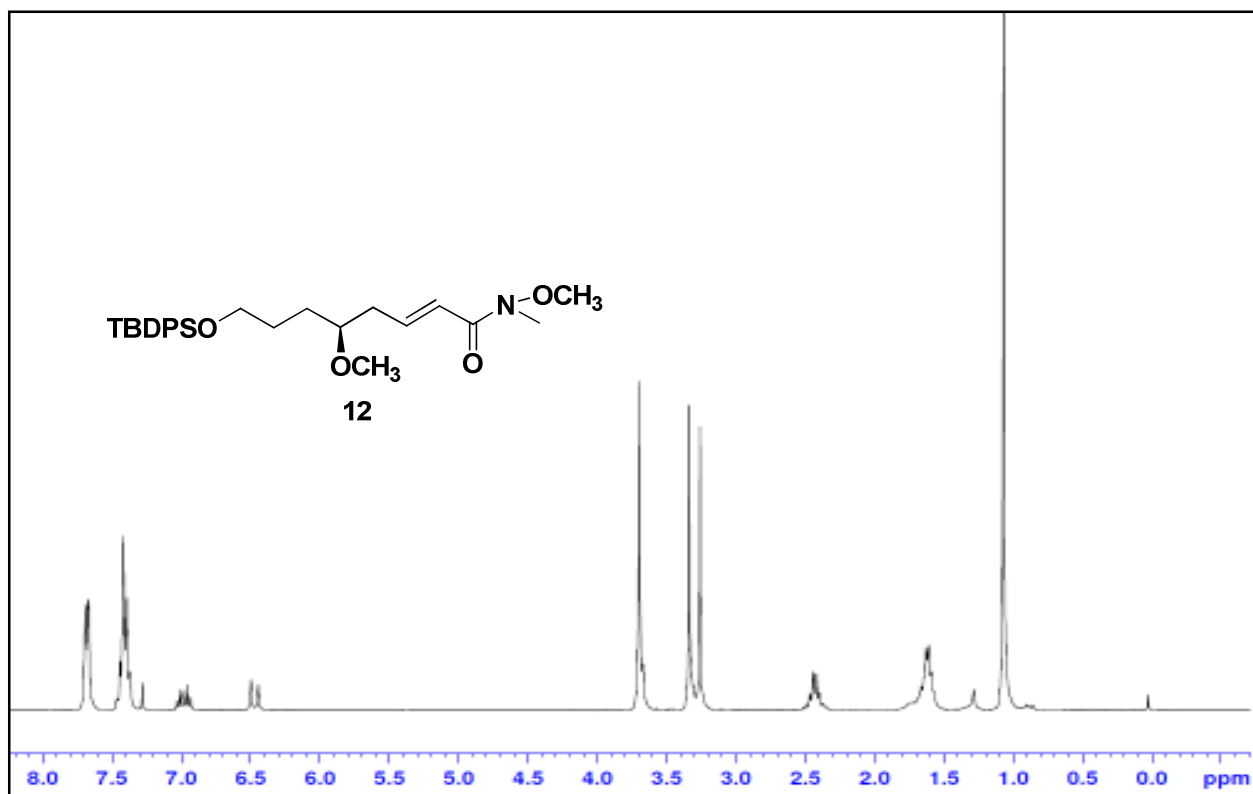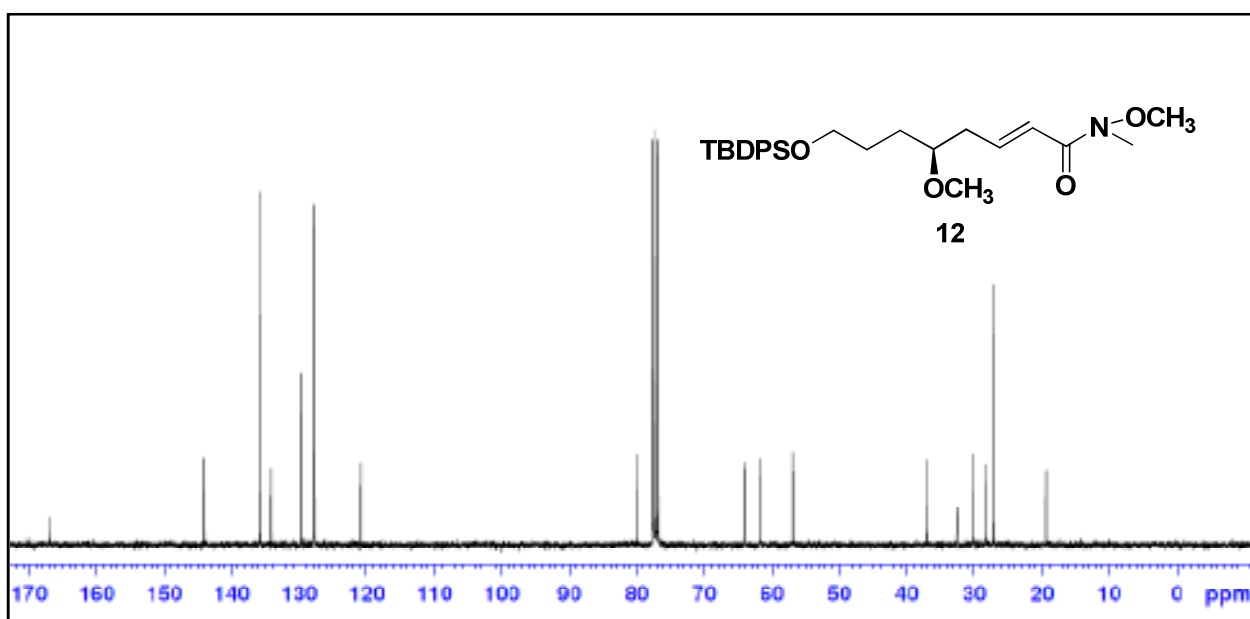

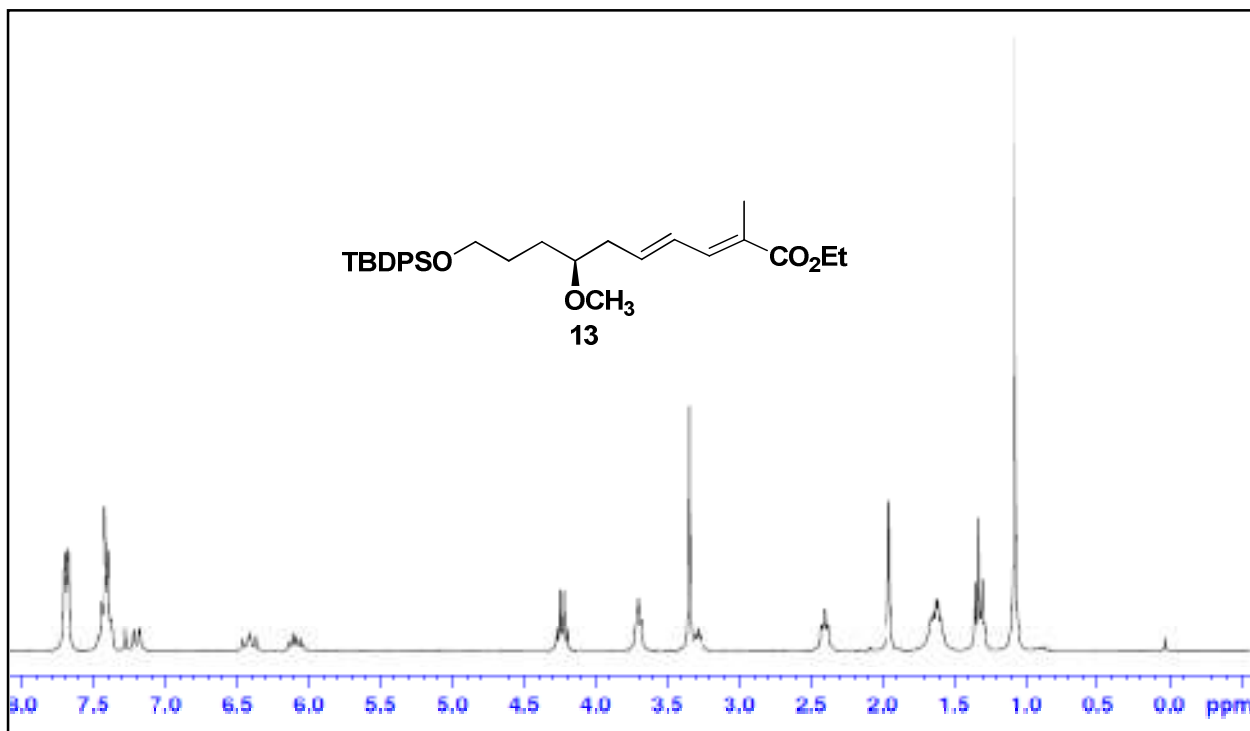

<sup>1</sup>H Spectrum of compound **13** in CDCl<sub>3</sub> (300 MHz)

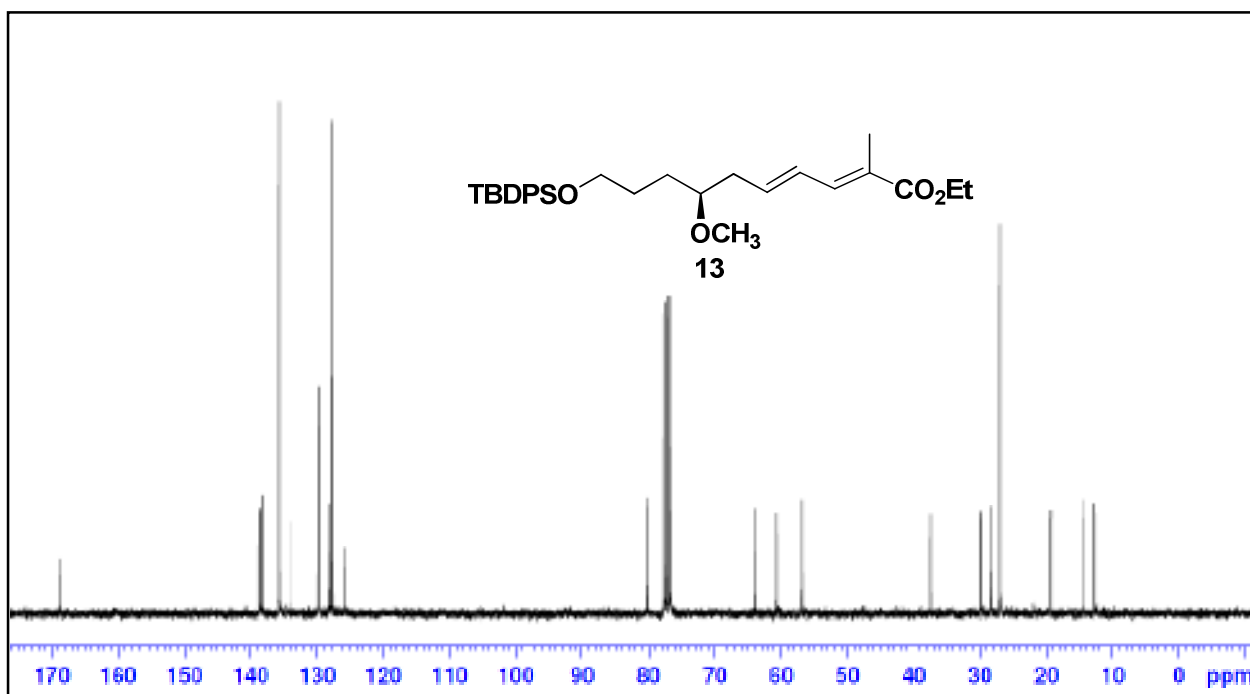

<sup>13</sup>C Spectrum of compound **13** in CDCl<sub>3</sub> (50 MHz)

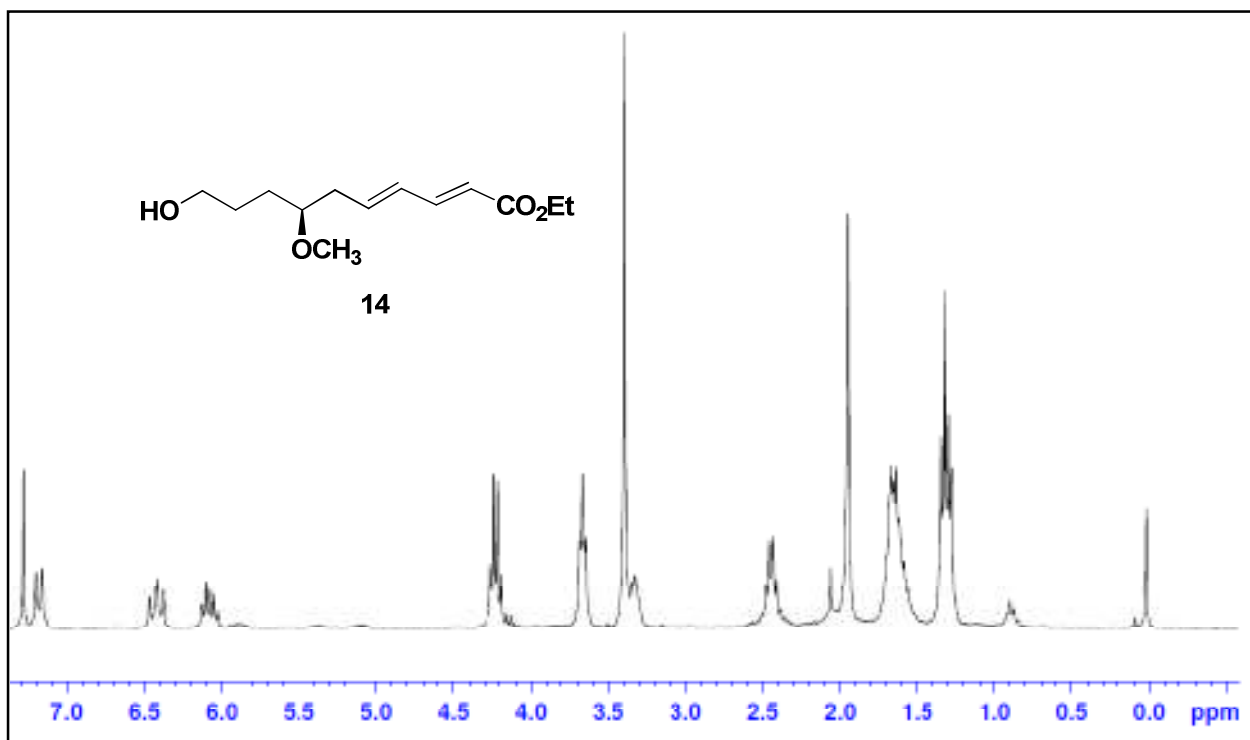

<sup>1</sup>H Spectrum of compound **14** in CDCl<sub>3</sub> (300 MHz)

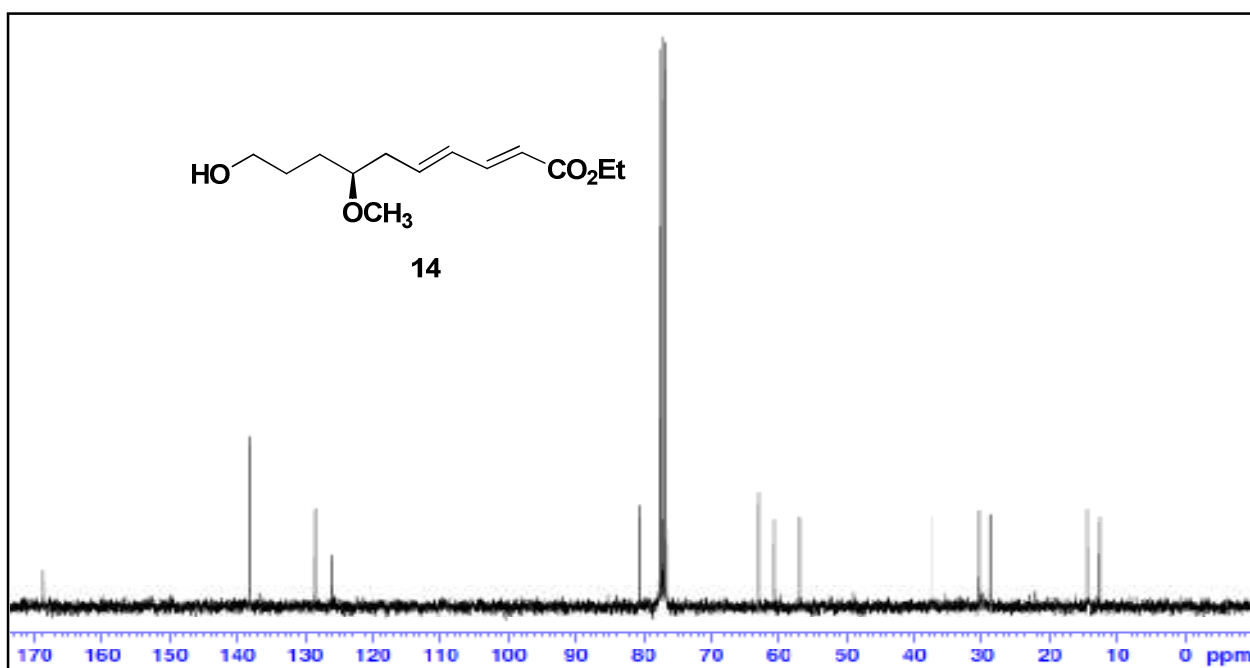

<sup>13</sup>C Spectrum of compound **14** in CDCl<sub>3</sub> (50 MHz)



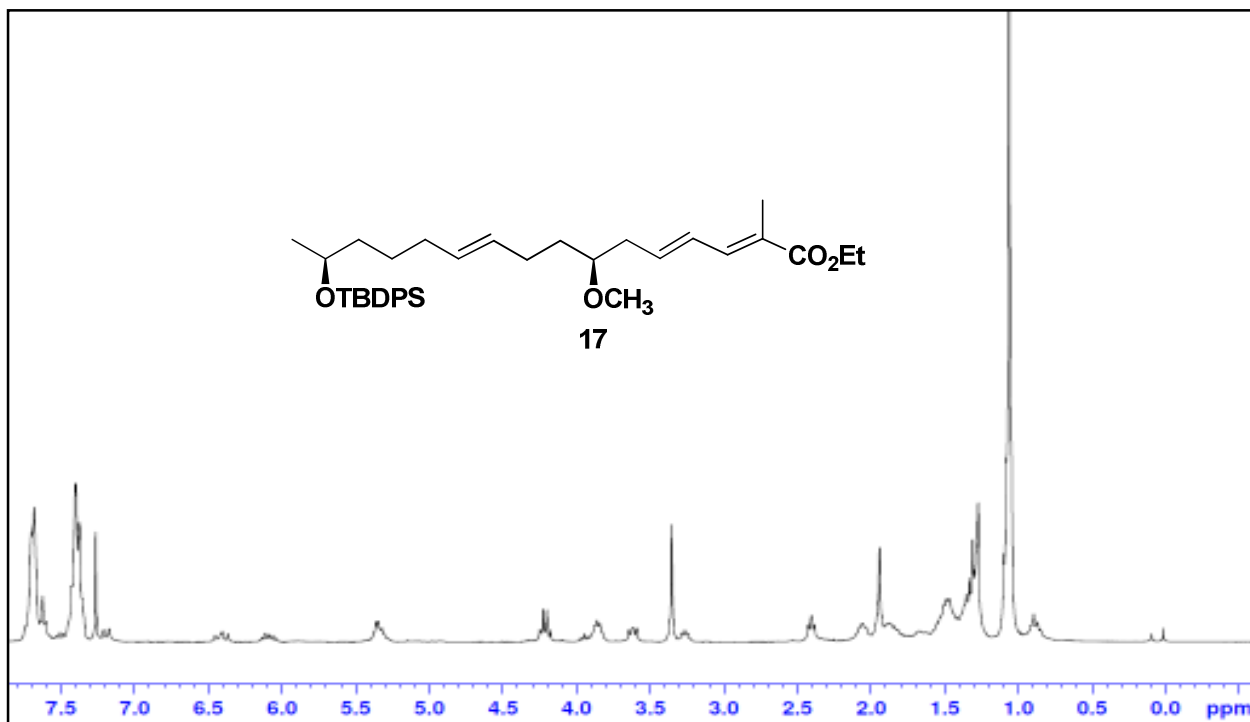

<sup>1</sup>H Spectrum of compound 17 in CDCl<sub>3</sub> (300 MHz)

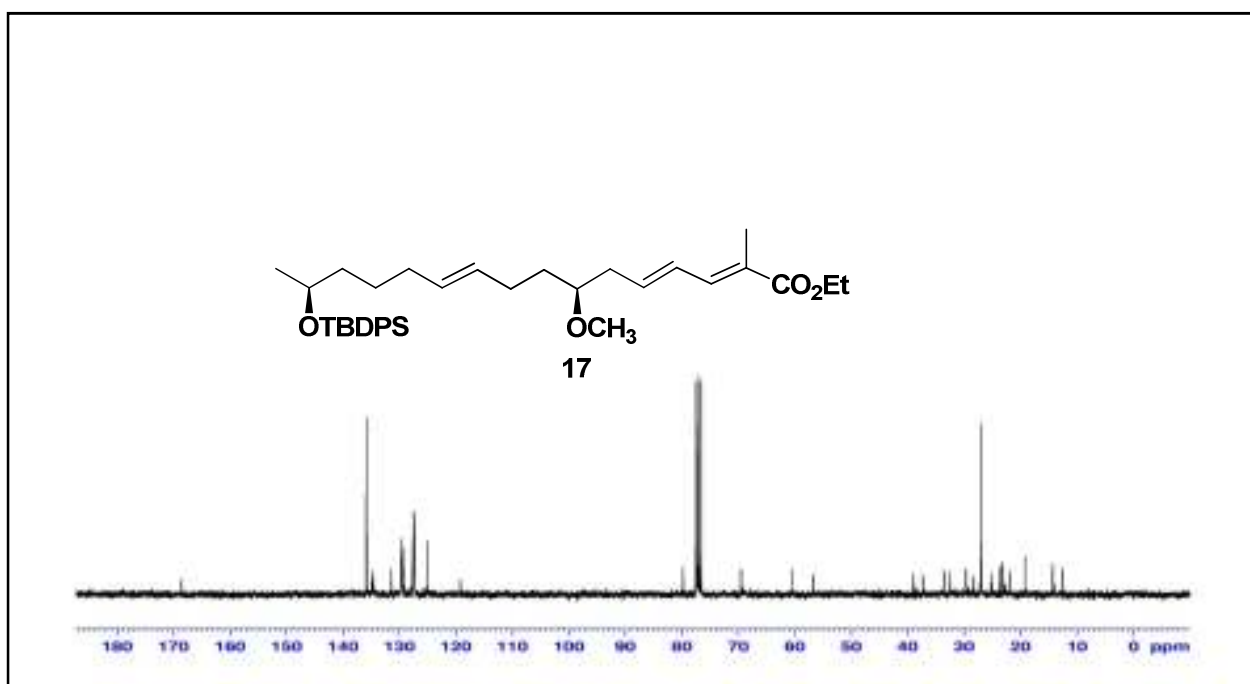

<sup>13</sup>C Spectrum of compound 17 in CDCl<sub>3</sub> (75 MHz)

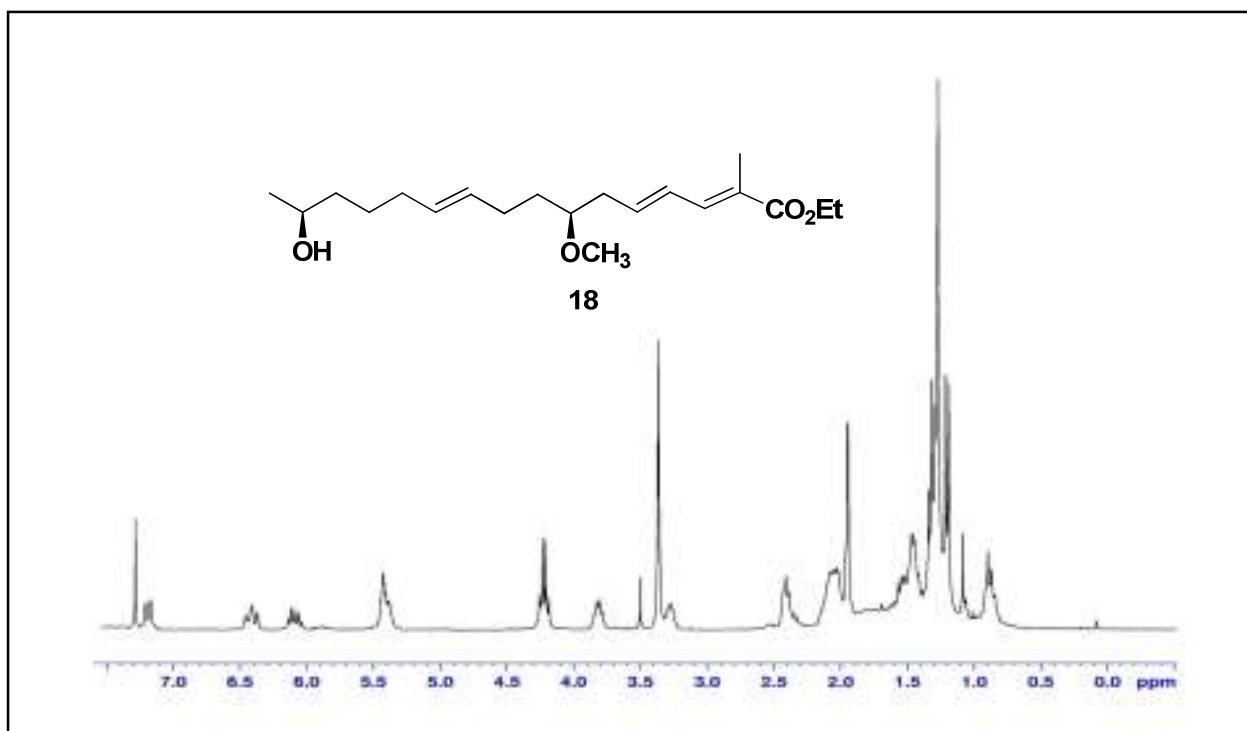

<sup>1</sup>H Spectrum of compound **18** in CDCl<sub>3</sub> (300 MHz)

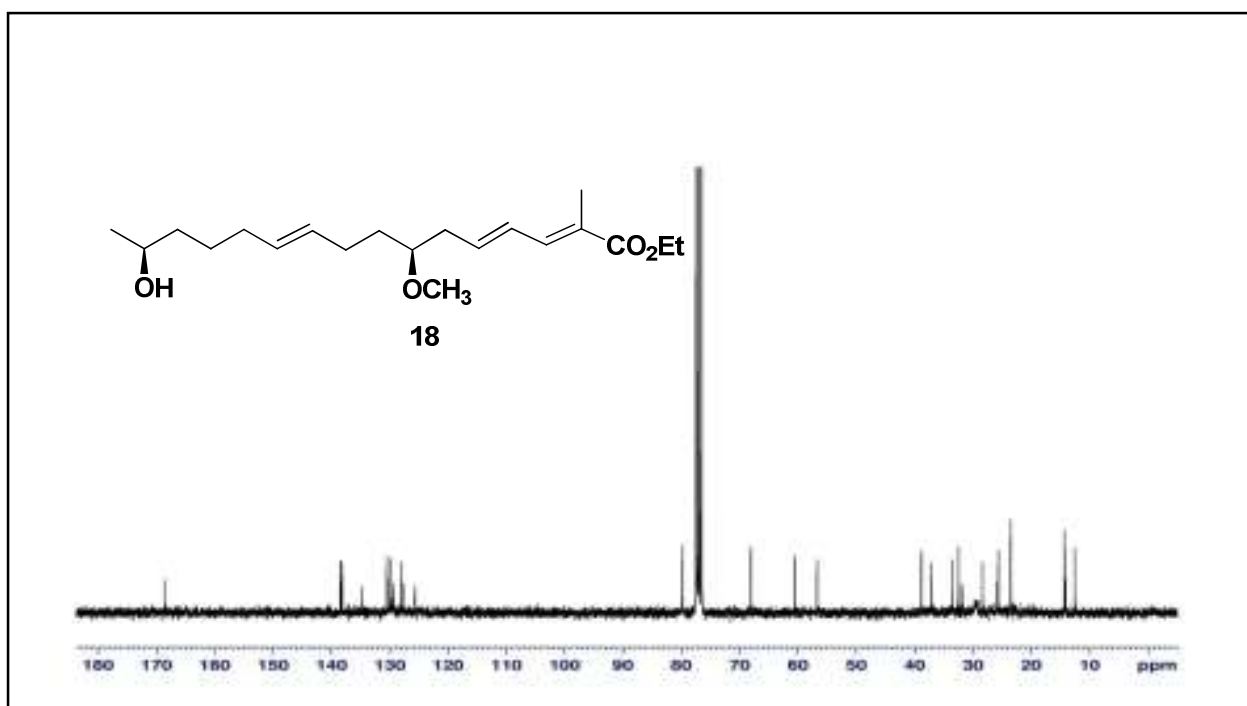

<sup>13</sup>C Spectrum of compound **18** in CDCl<sub>3</sub> (75 MHz)

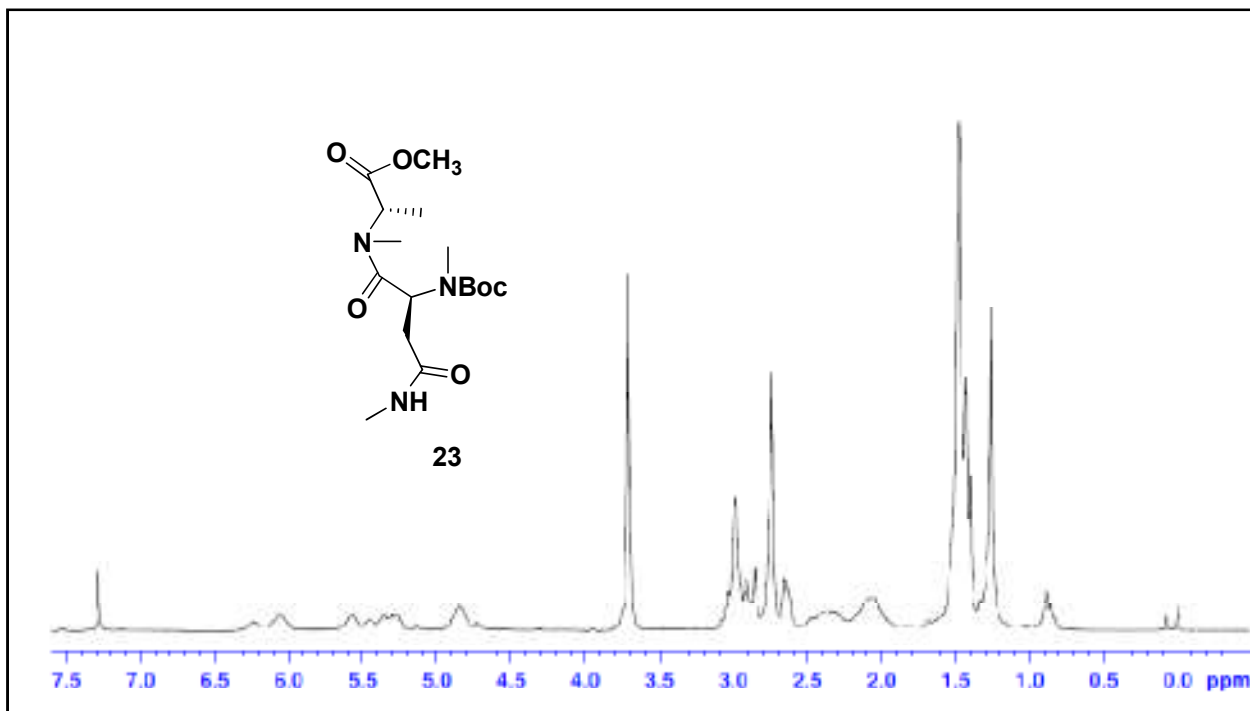

$^1\text{H}$  Spectrum of compound **23** in  $\text{CDCl}_3$  (300 MHz)

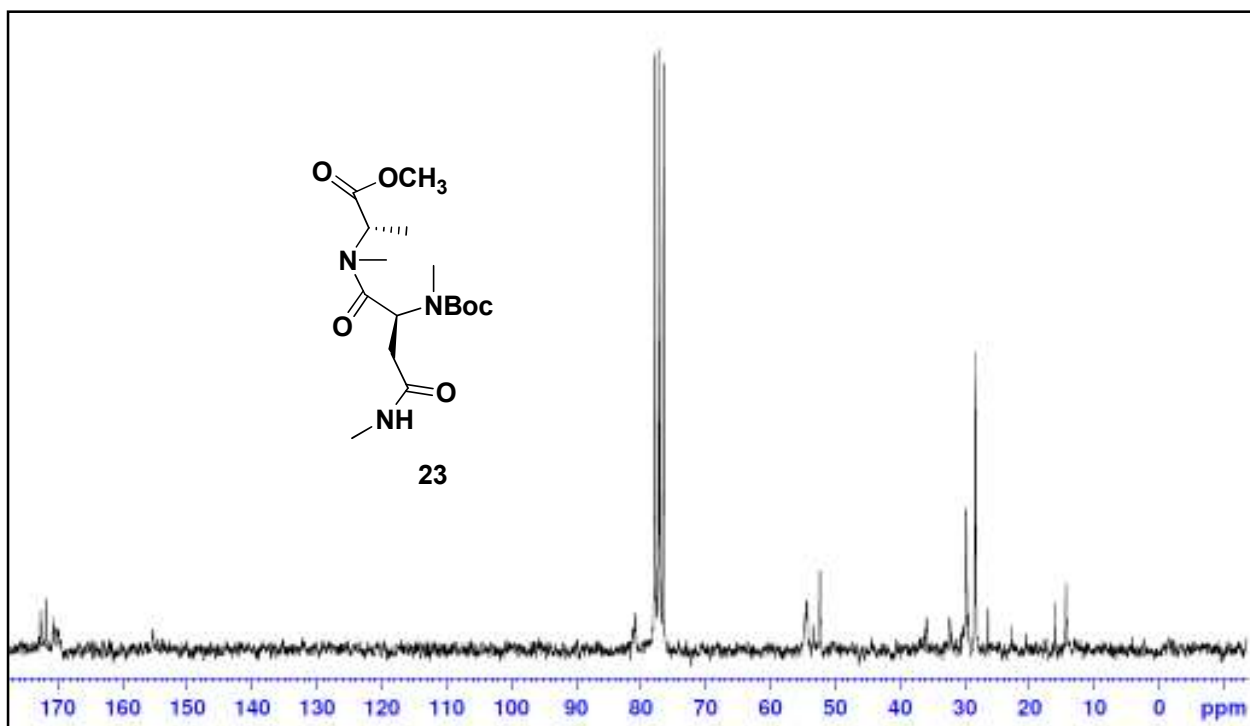

$^{13}\text{C}$  Spectrum of compound **23** in  $\text{CDCl}_3$  (50 MHz)



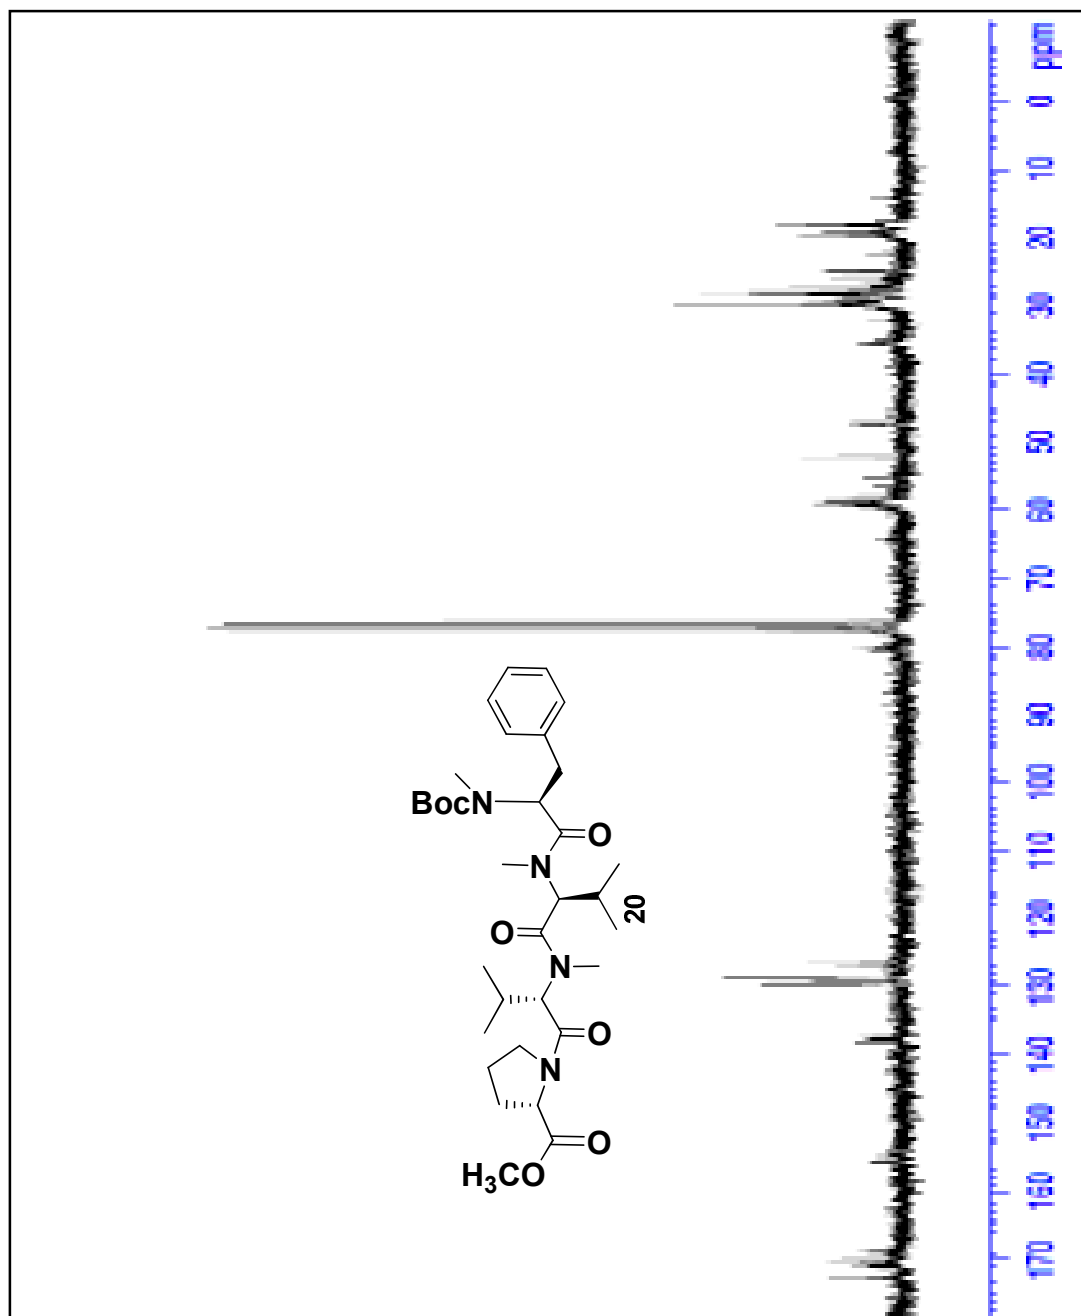

$^{13}\text{C}$  Spectrum of compound **20** in  $\text{CDCl}_3$  (50 MHz)

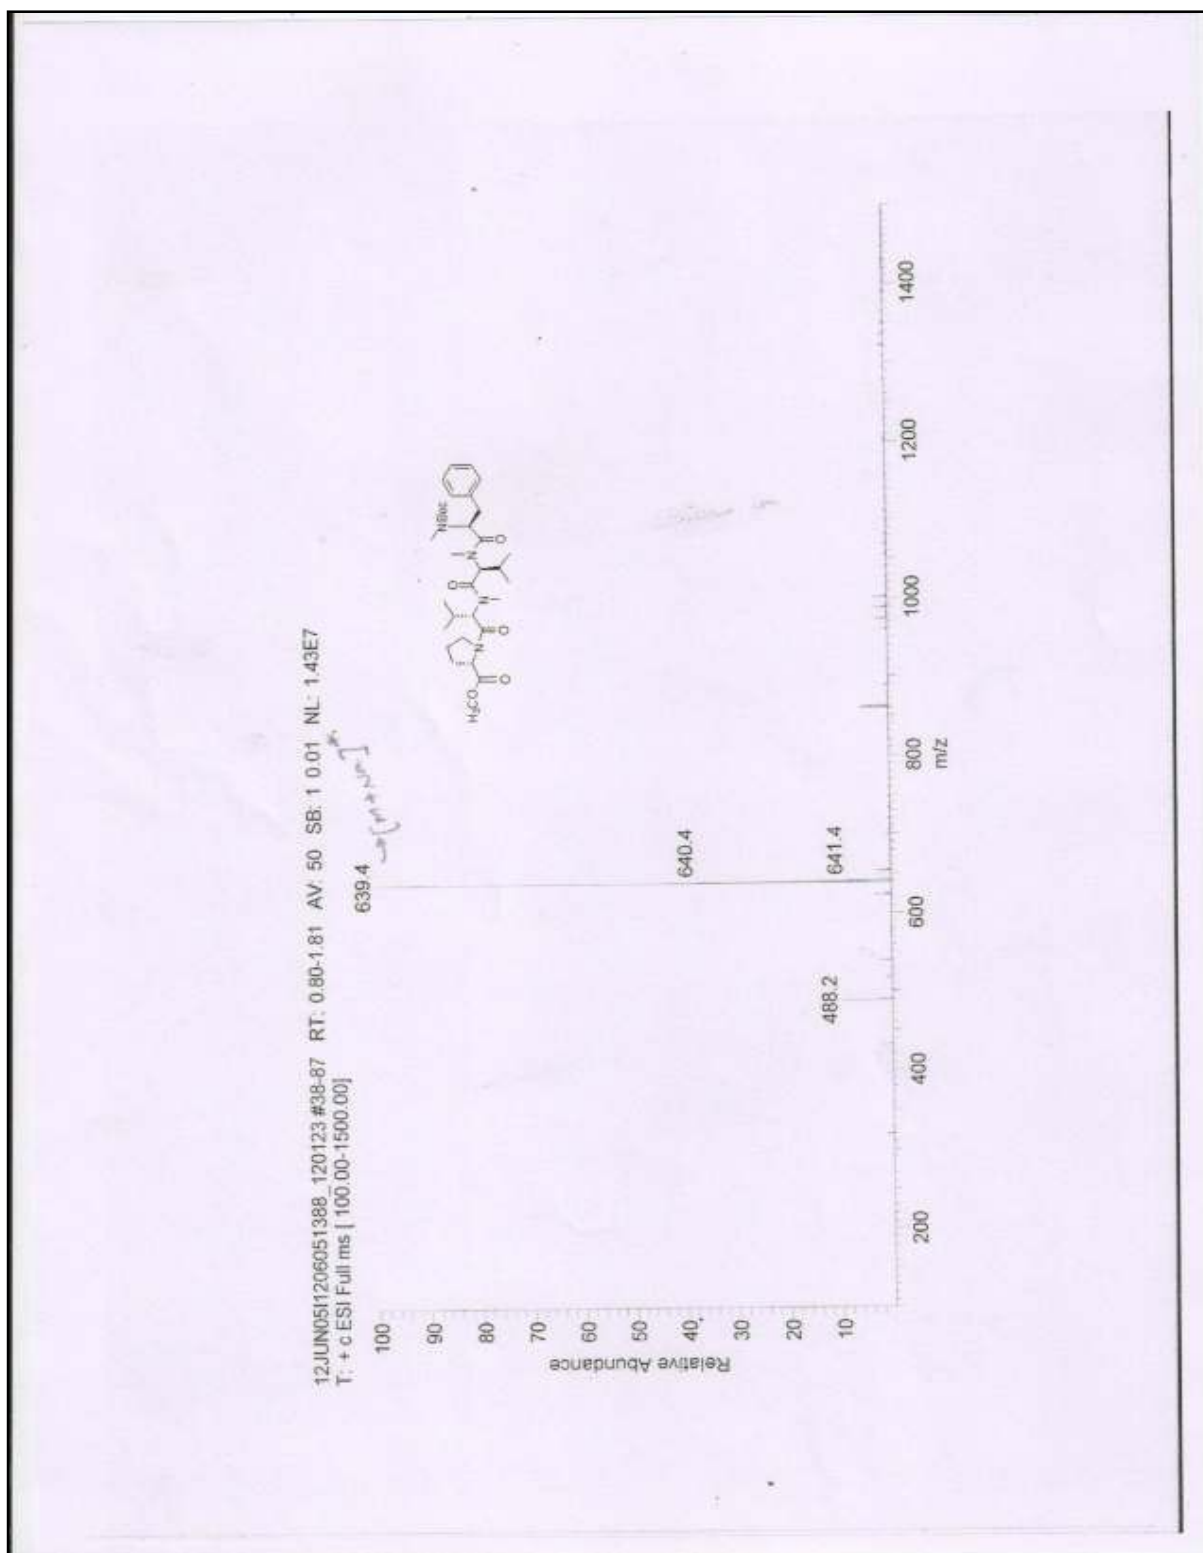

ESI-MS Spectrum of compound **20**

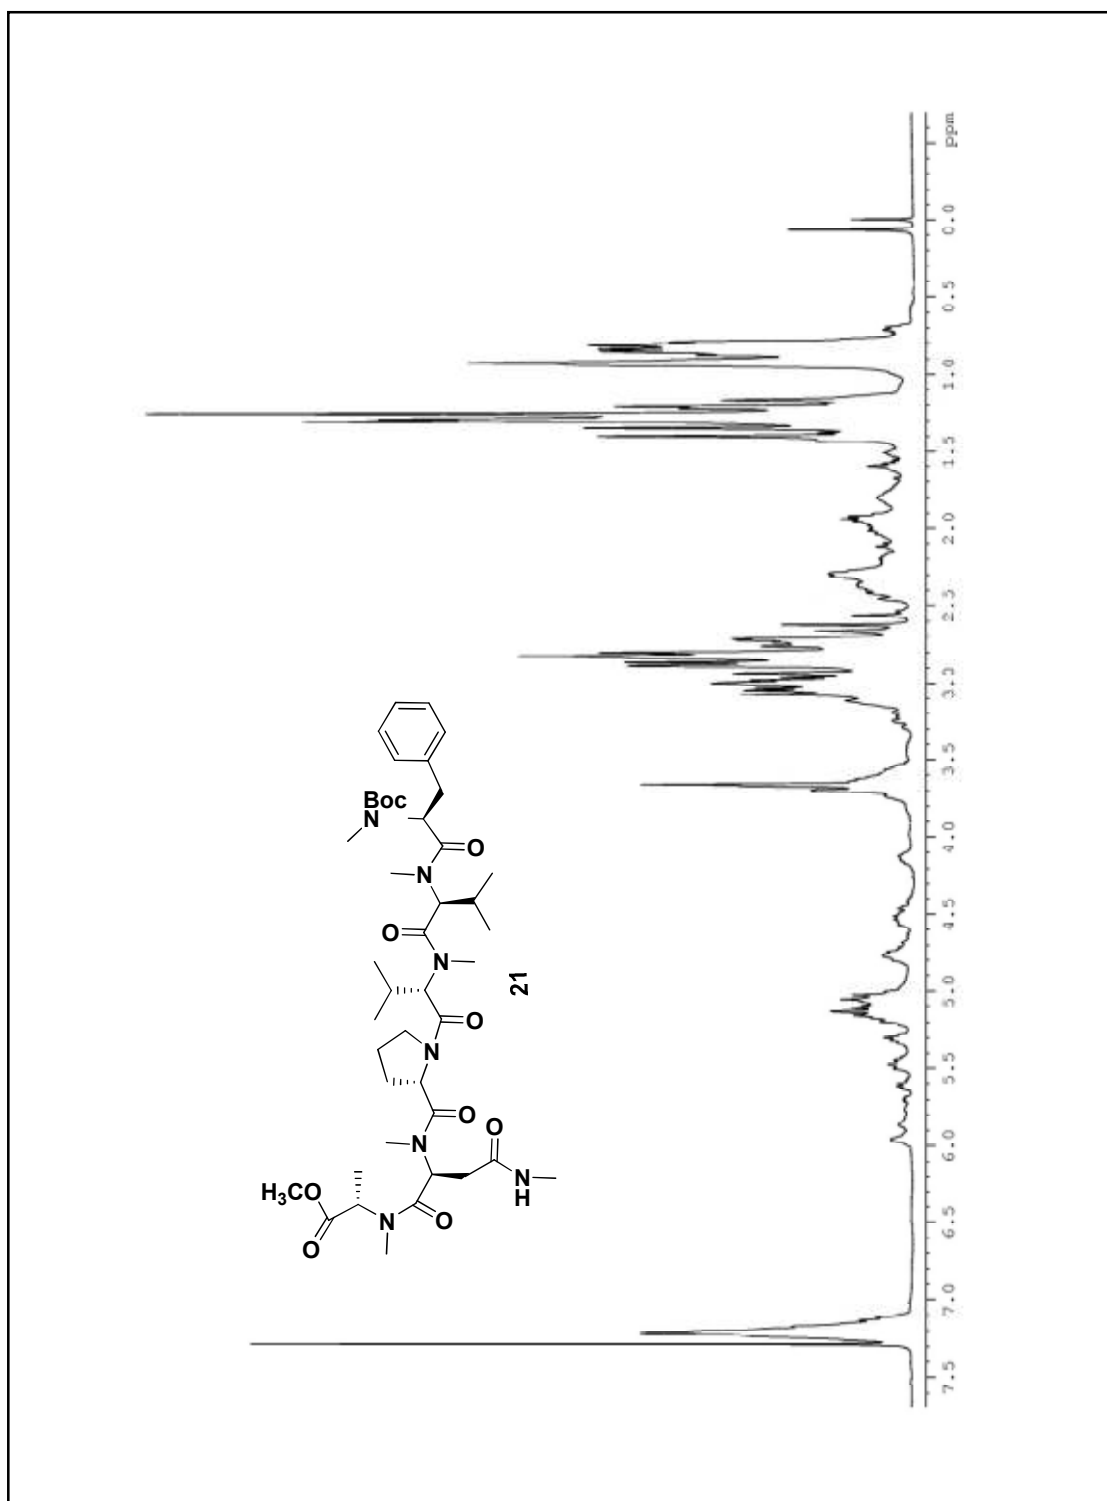

$^1\text{H}$  Spectrum of compound **21** in  $\text{CDCl}_3$  (400 MHz)

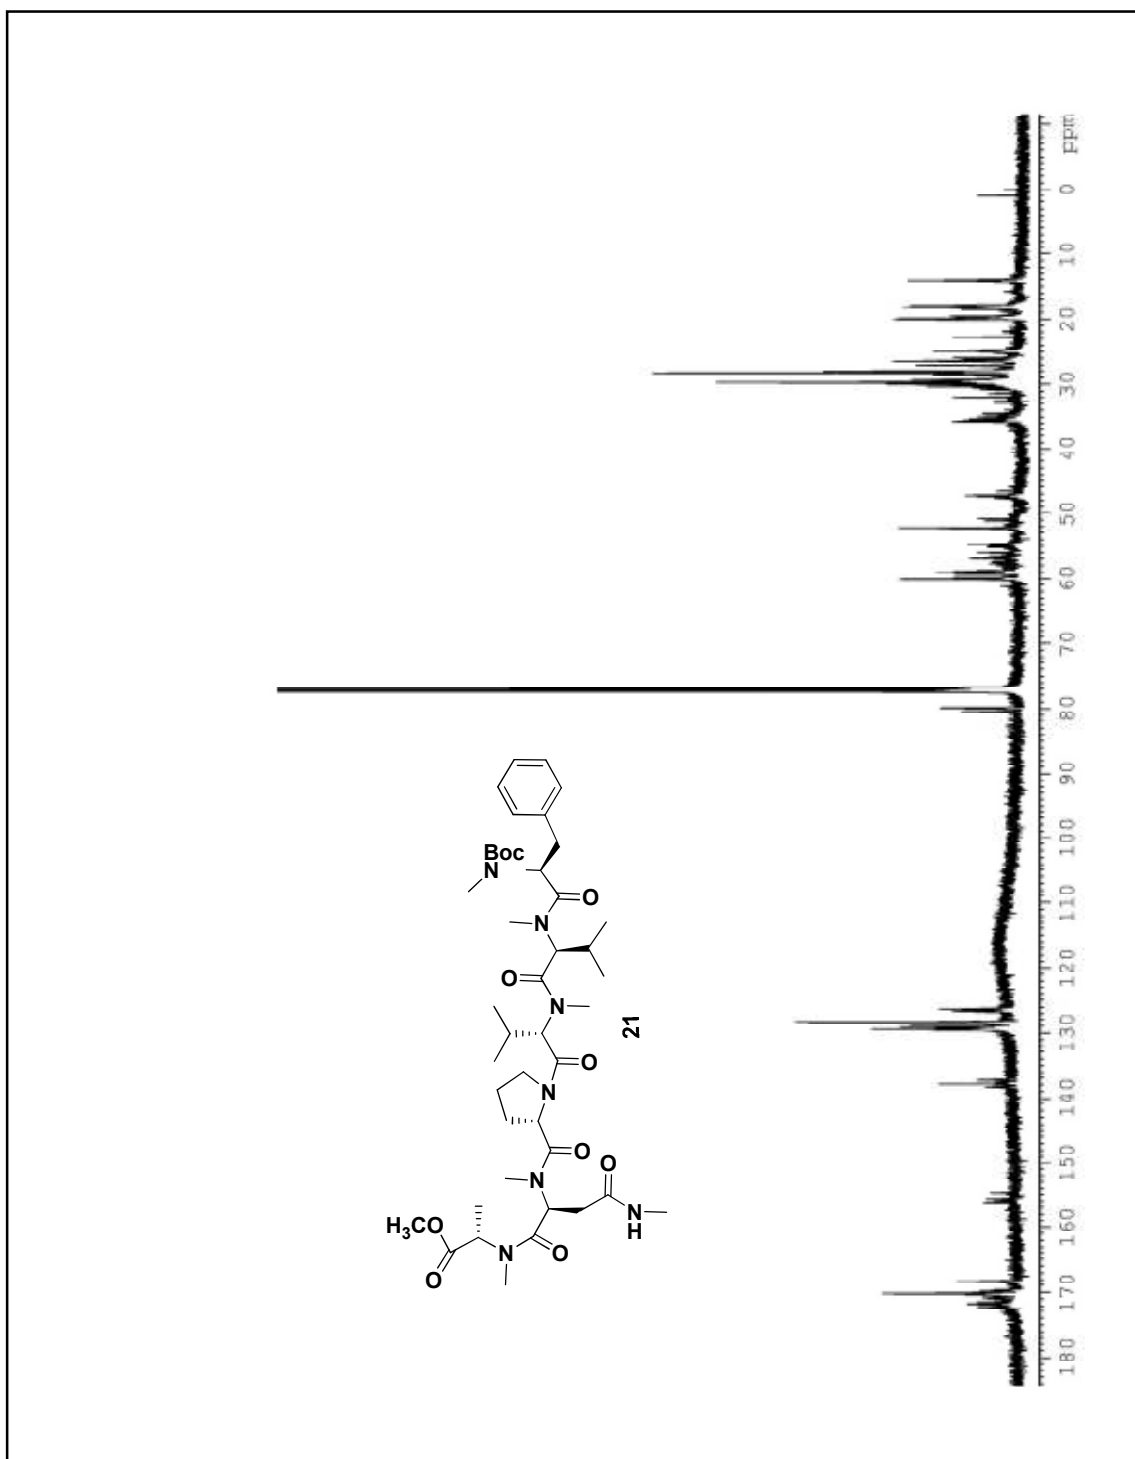

$^{13}\text{C}$  Spectrum of compound **21** in  $\text{CDCl}_3$  (100 MHz)





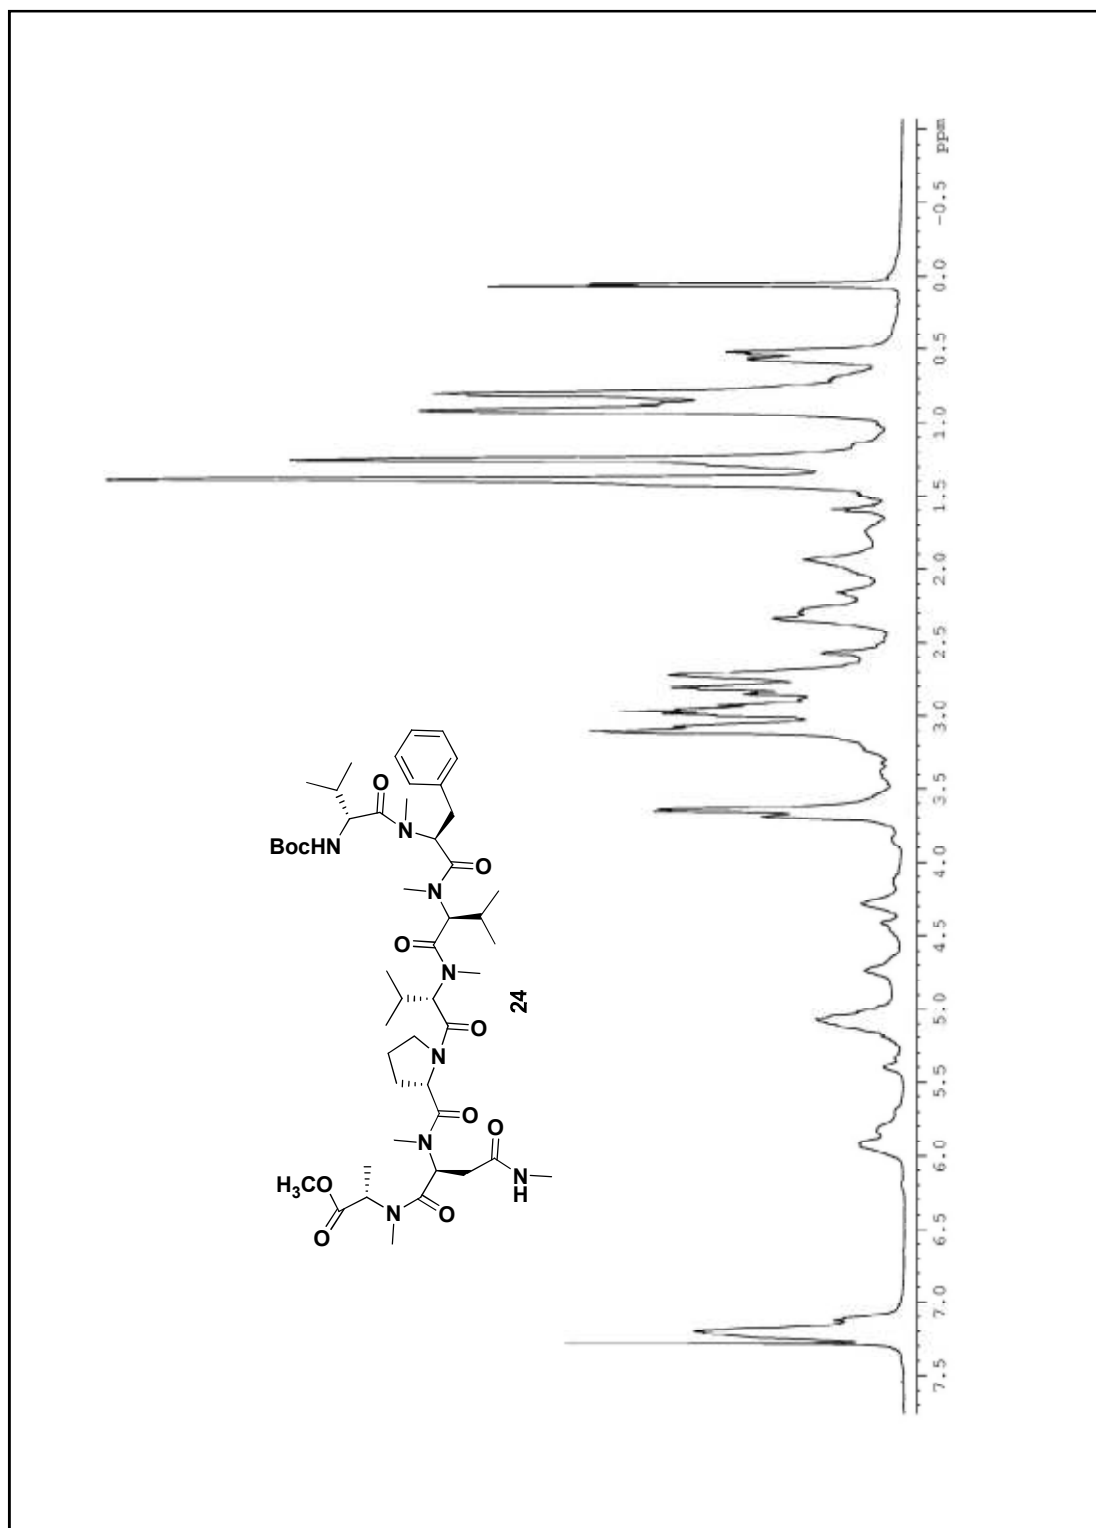

<sup>1</sup>H Spectrum of compound **24** in CDCl<sub>3</sub> (400 MHz)

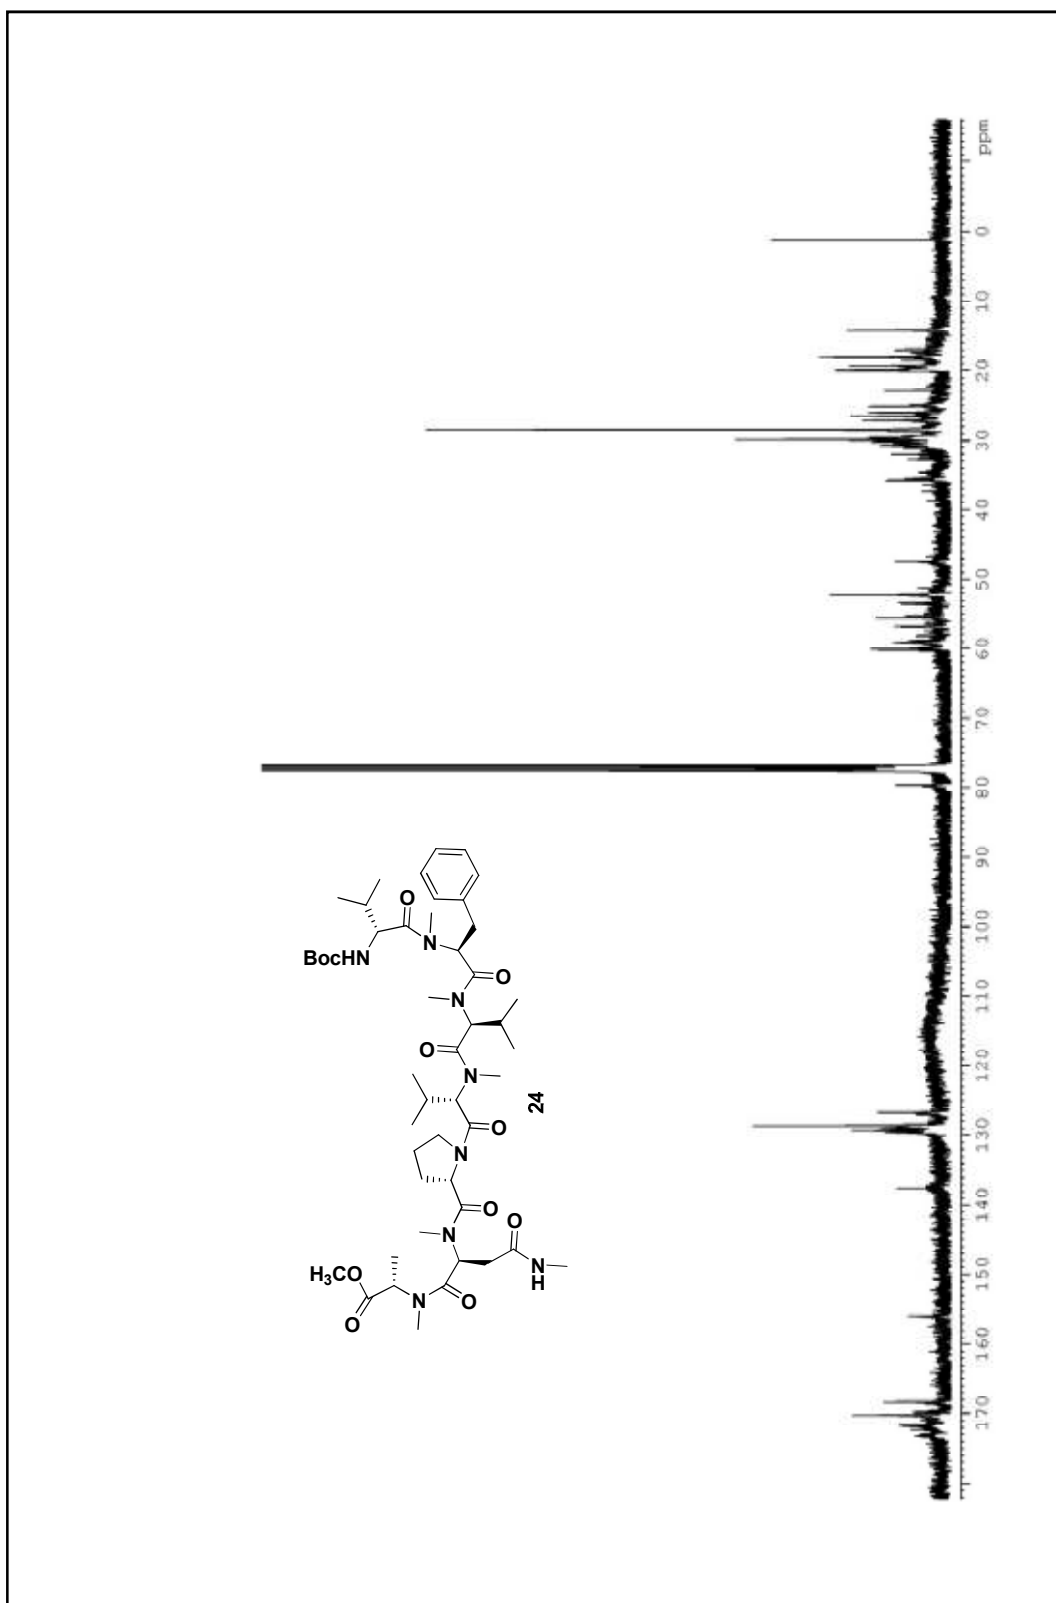

$^{13}\text{C}$  Spectrum of compound **24** in  $\text{CDCl}_3$  (100 MHz)

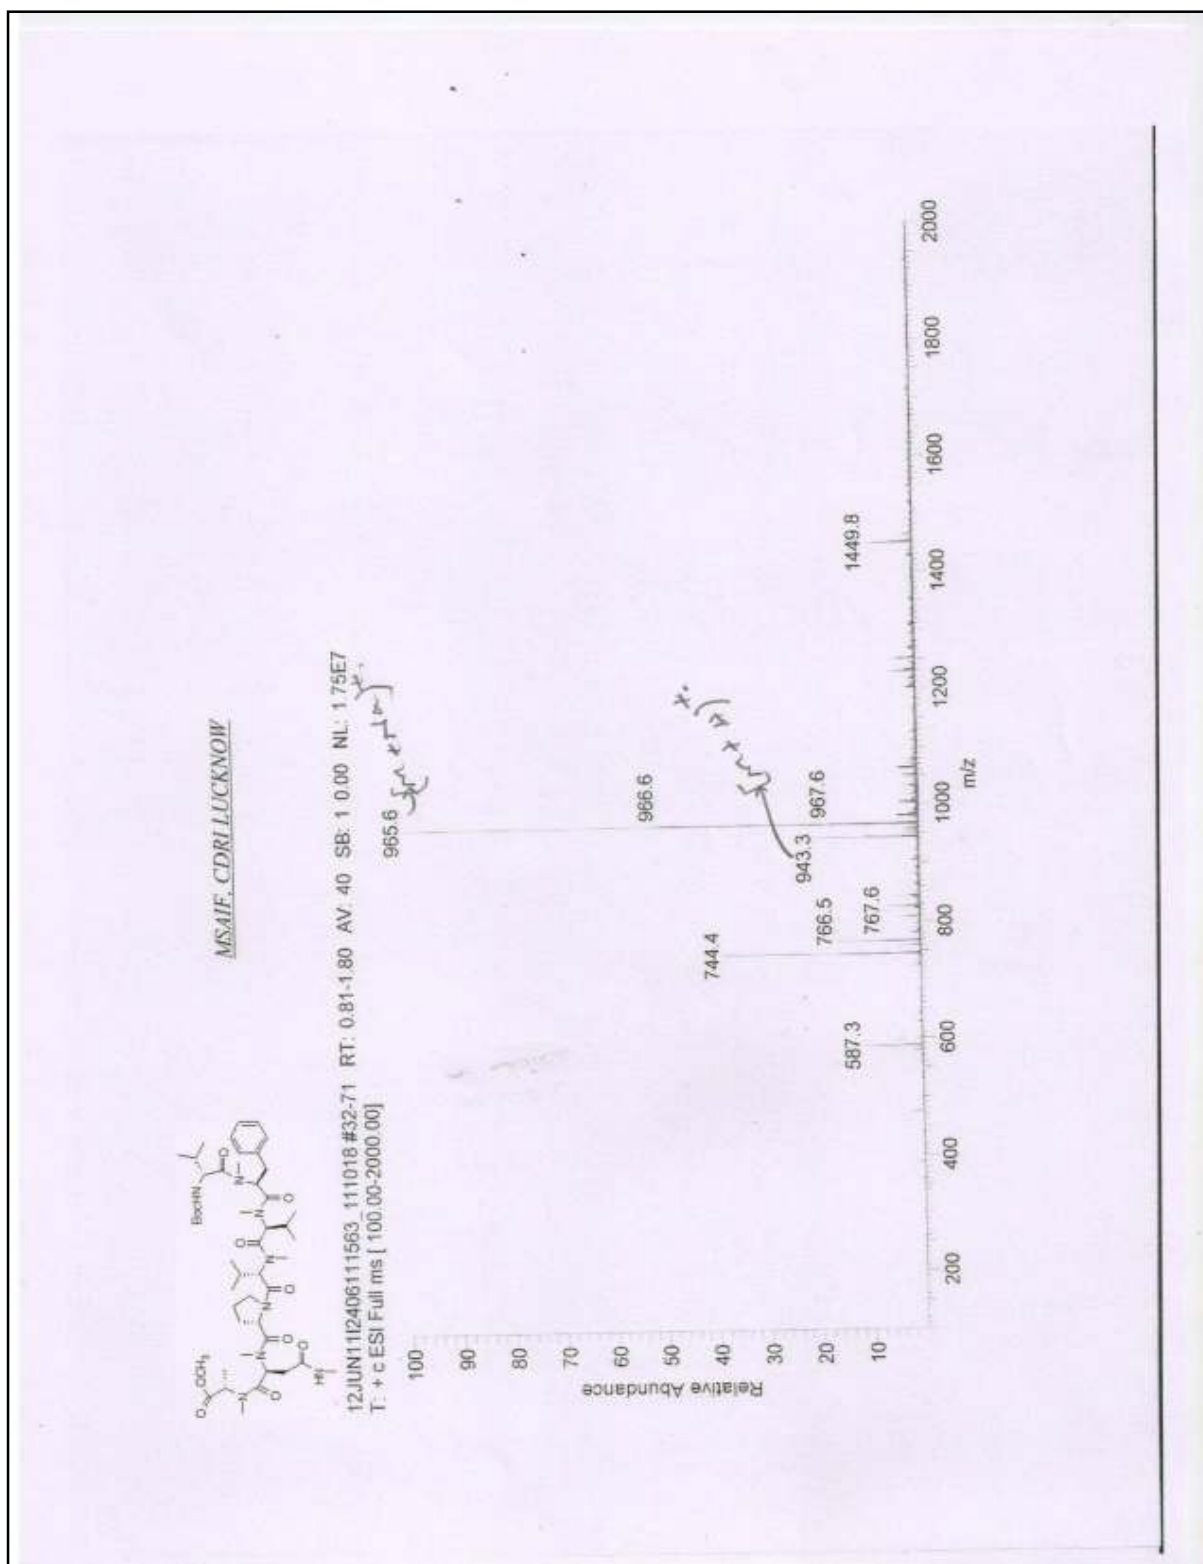

ESI-MS Spectrum of compound 24

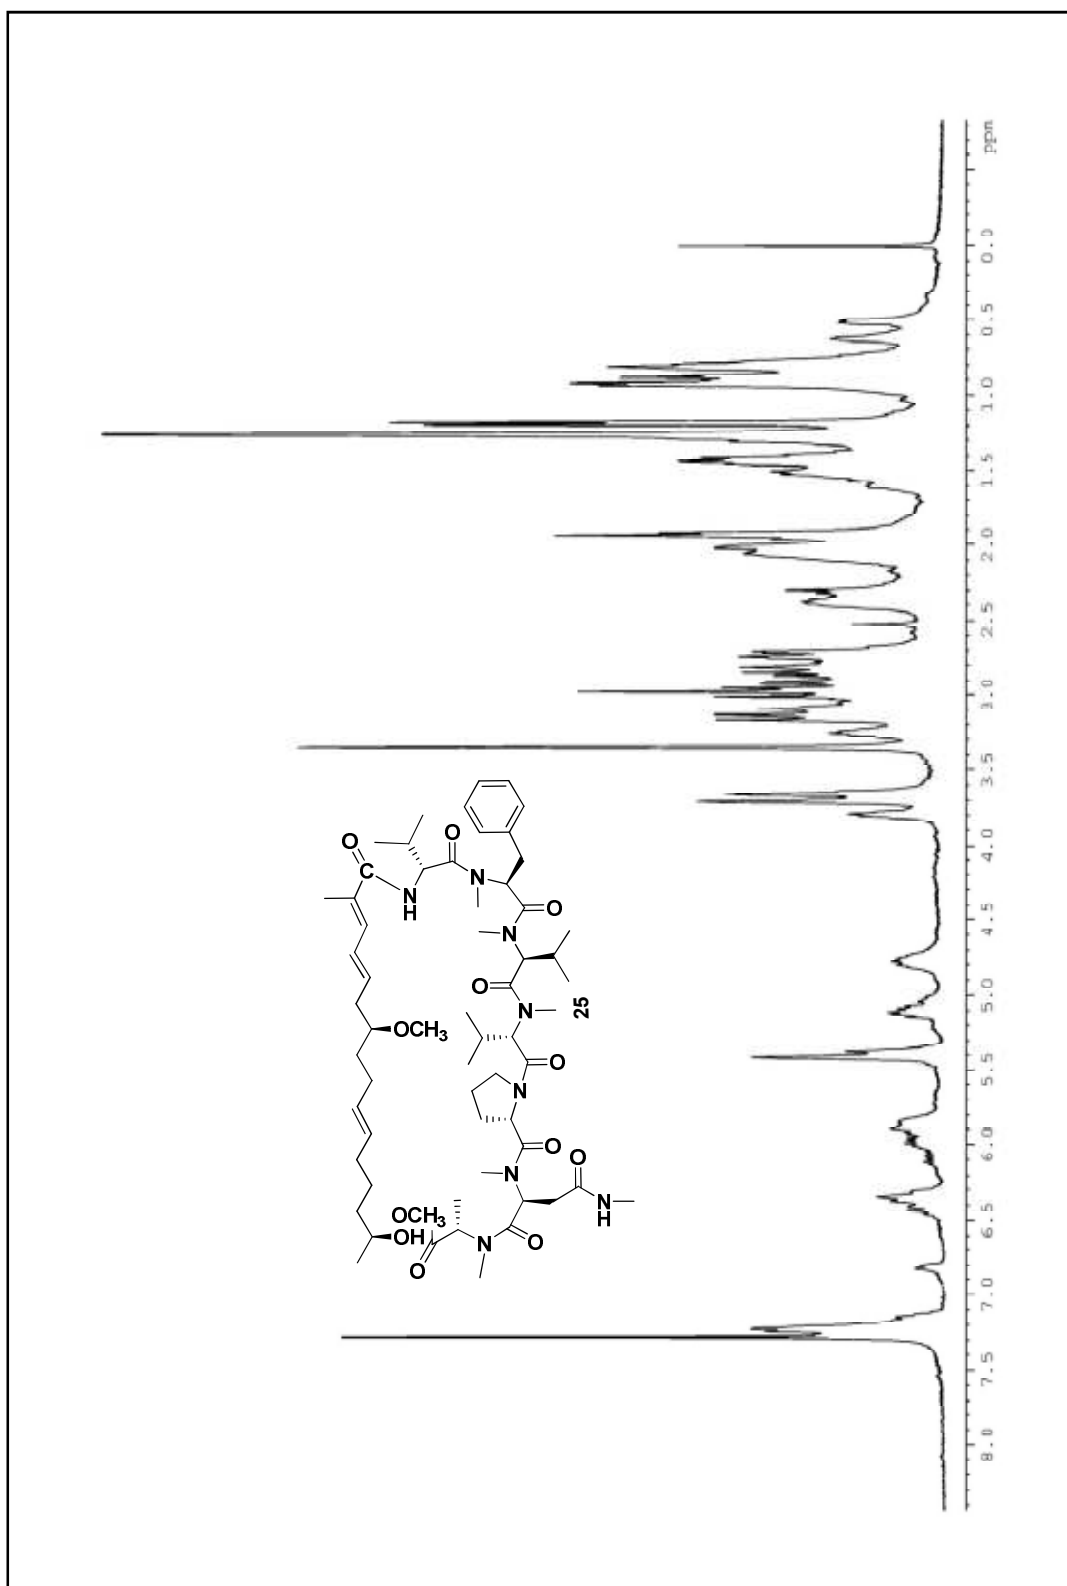

<sup>1</sup>H Spectrum of compound **25** in CDCl<sub>3</sub> (400 MHz)

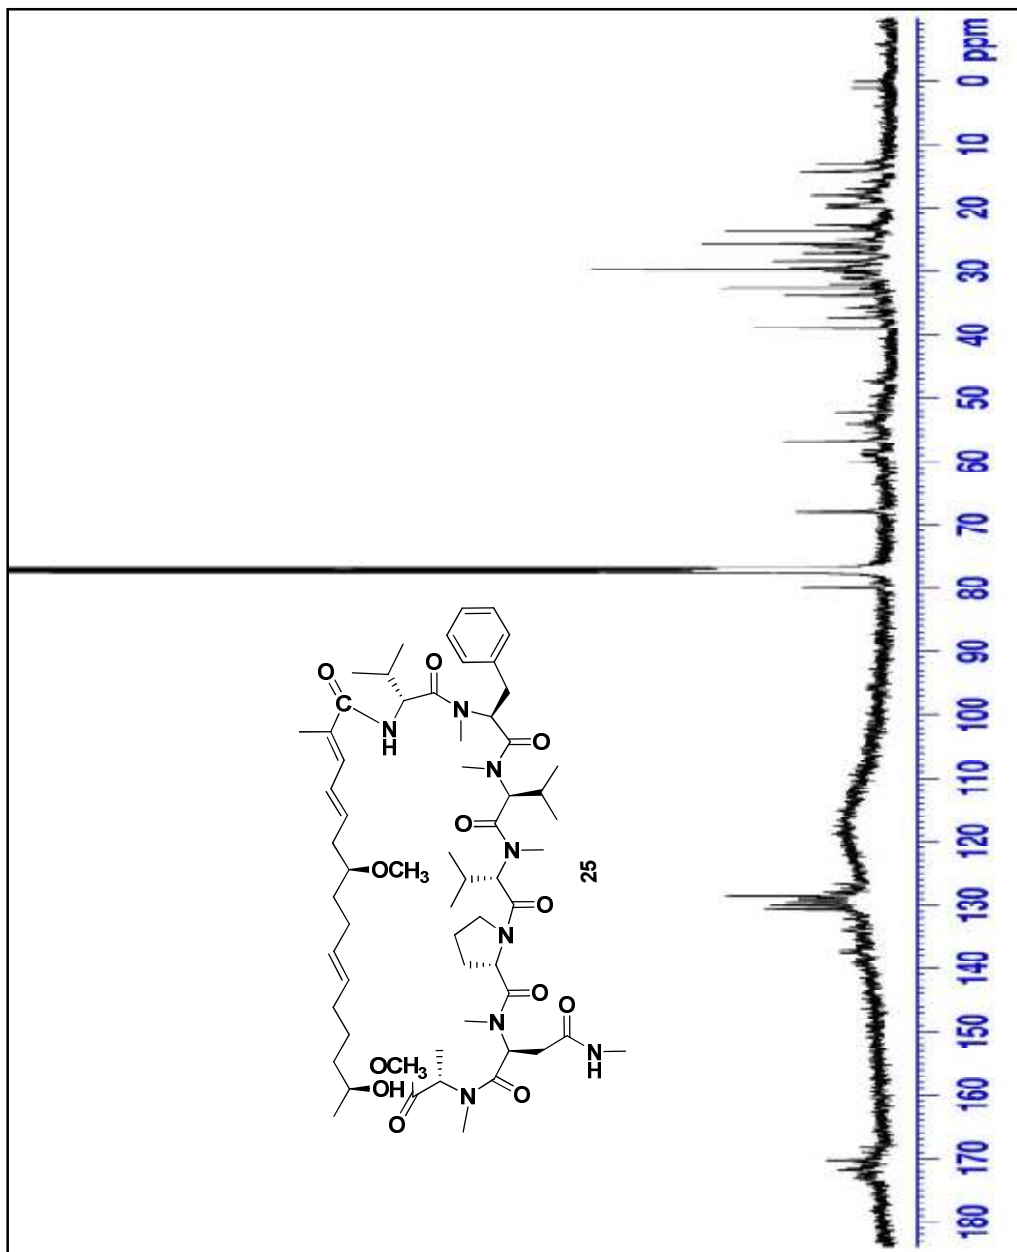

$^{13}\text{C}$  Spectrum of compound **25** in  $\text{CDCl}_3$  (100 MHz)

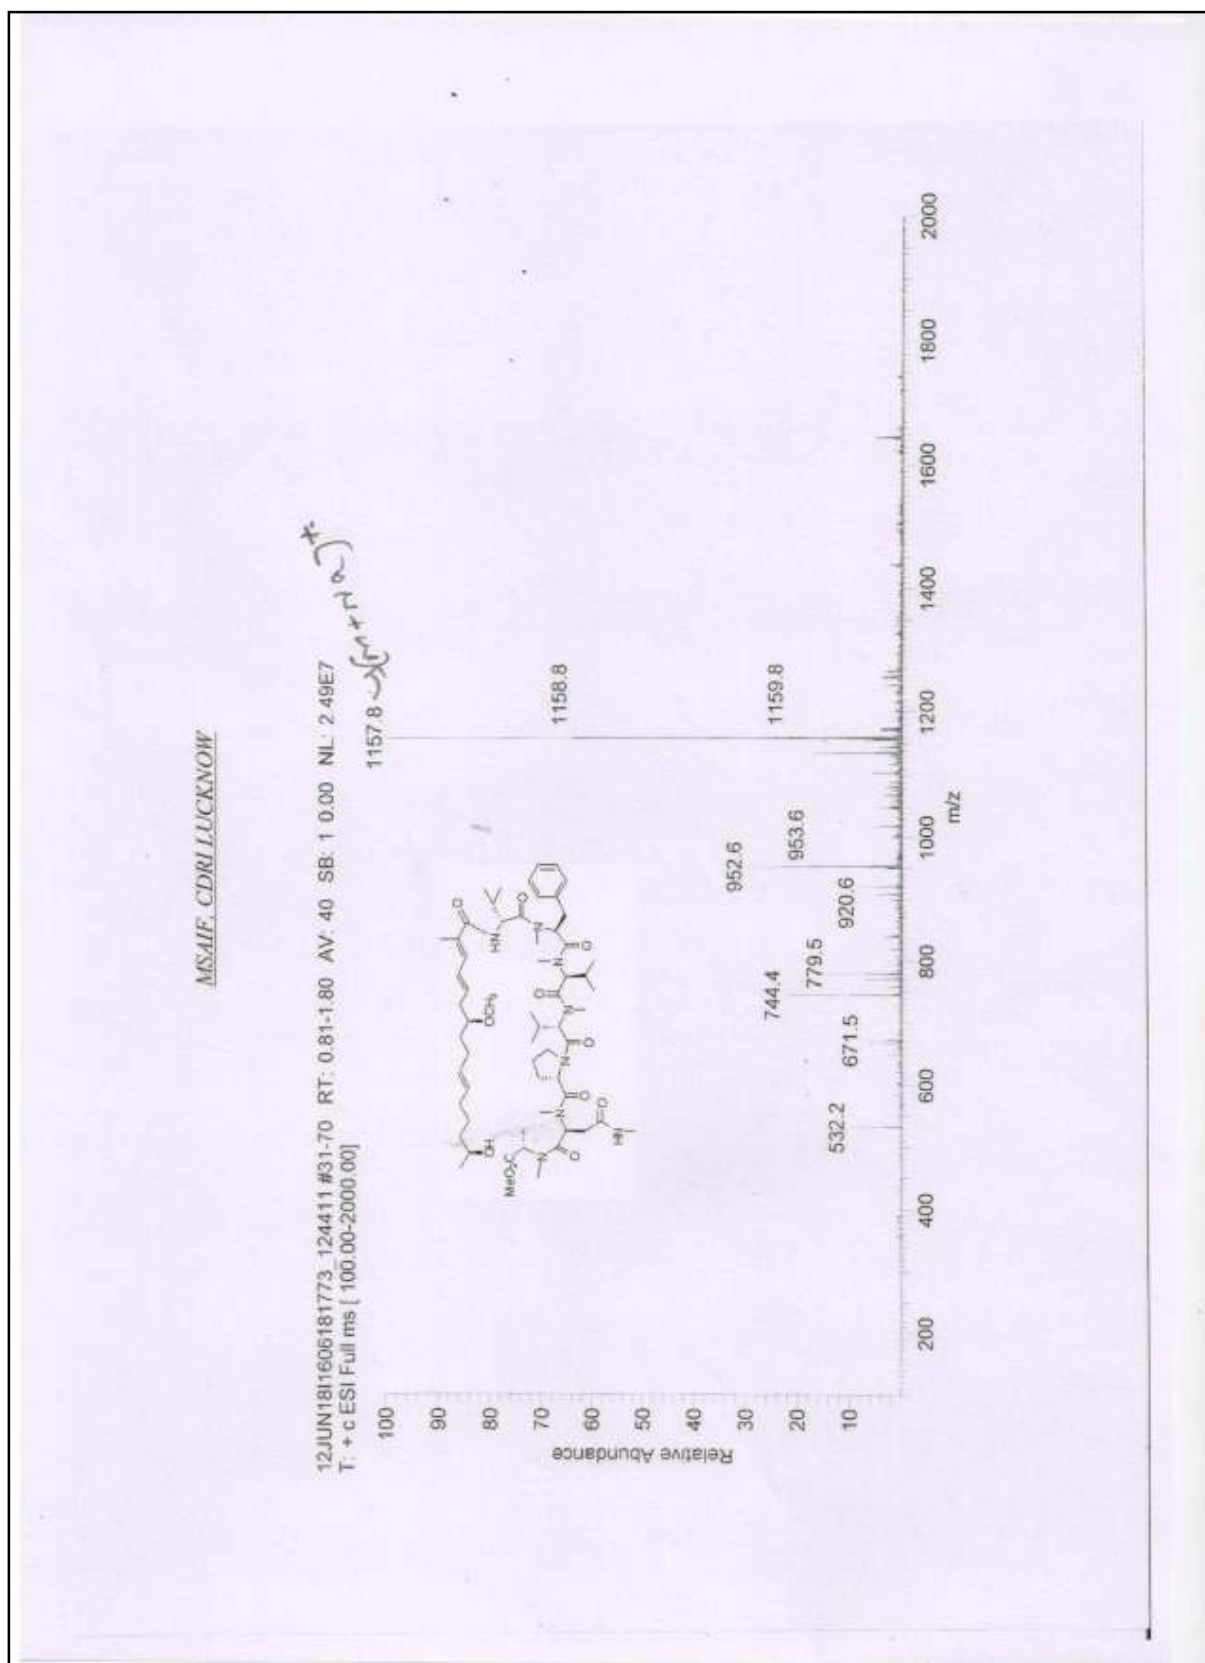

ESI-MS Spectrum of compound 25

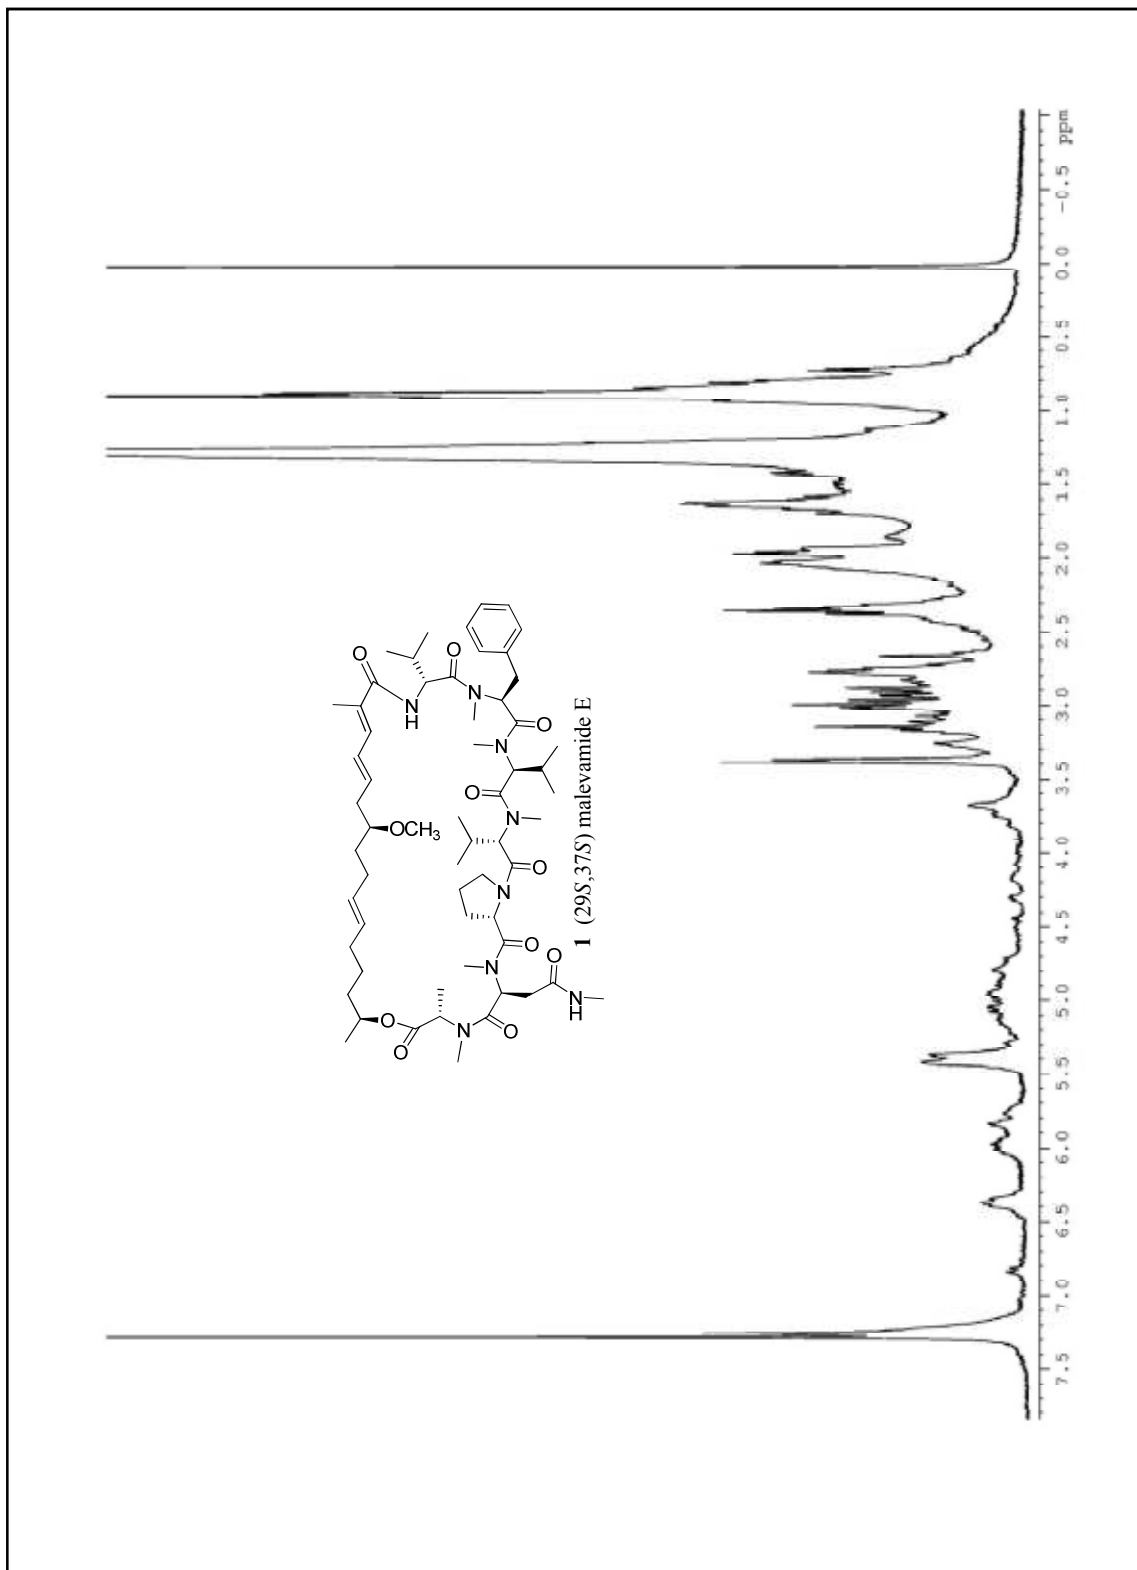

<sup>1</sup>H Spectrum of compound **1** in CDCl<sub>3</sub> (400 MHz)



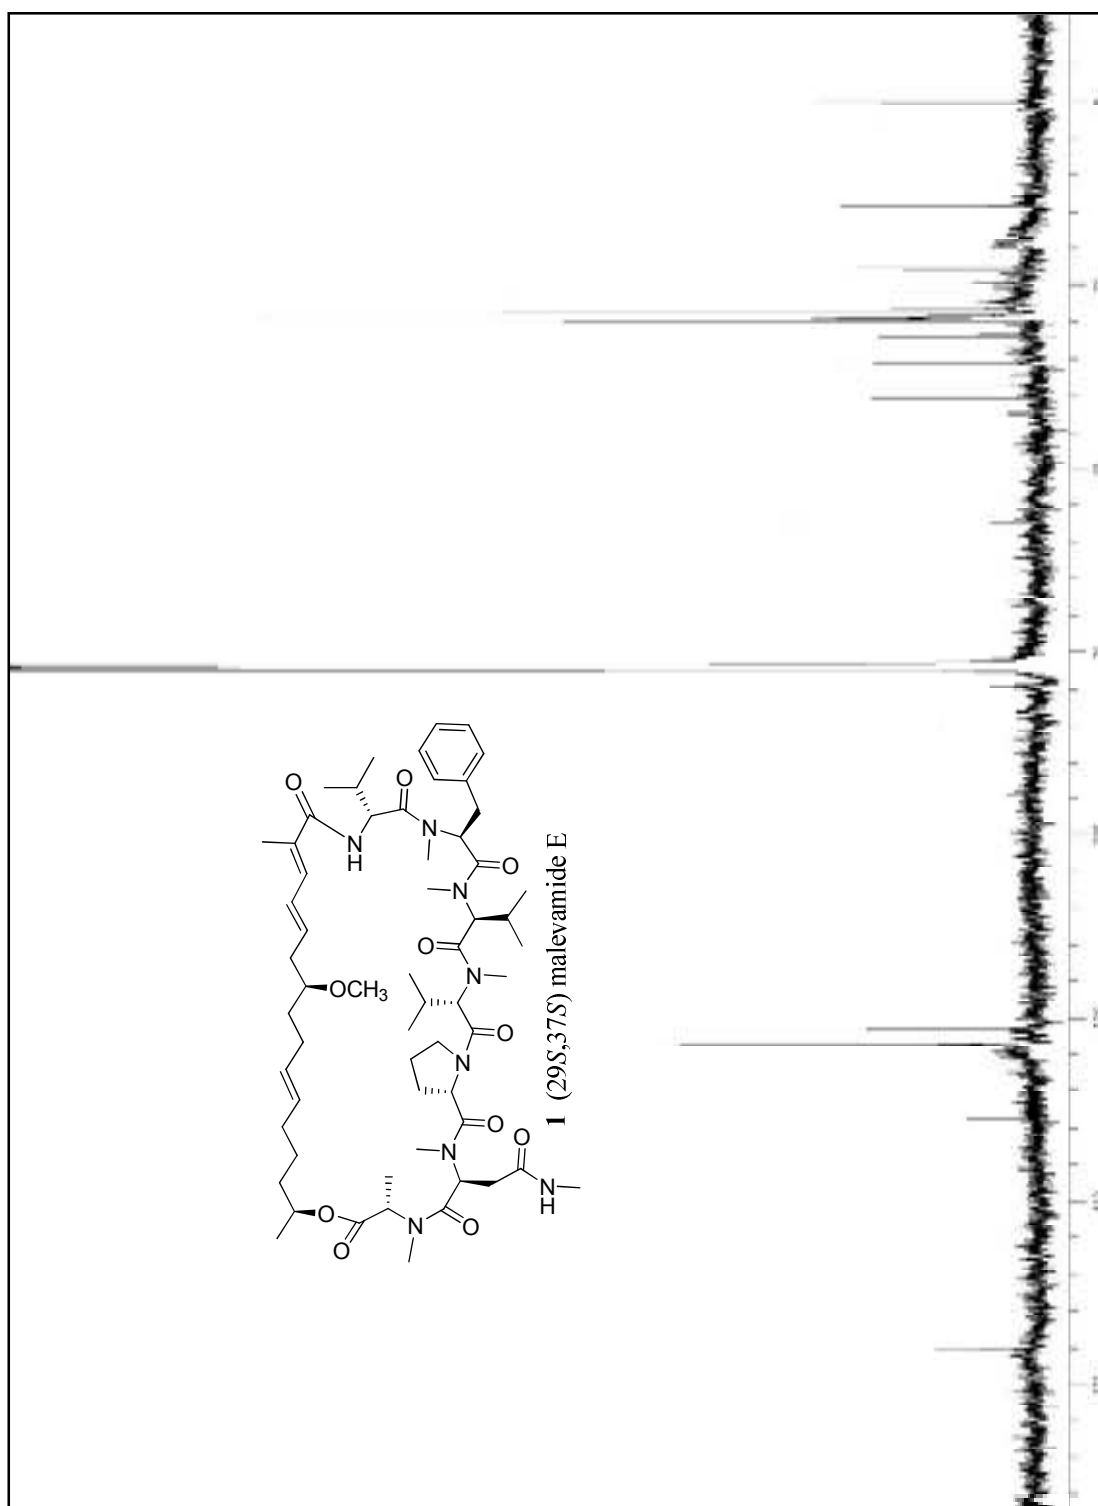

<sup>13</sup>C Spectrum of compound **1** in CDCl<sub>3</sub> (150 MHz)

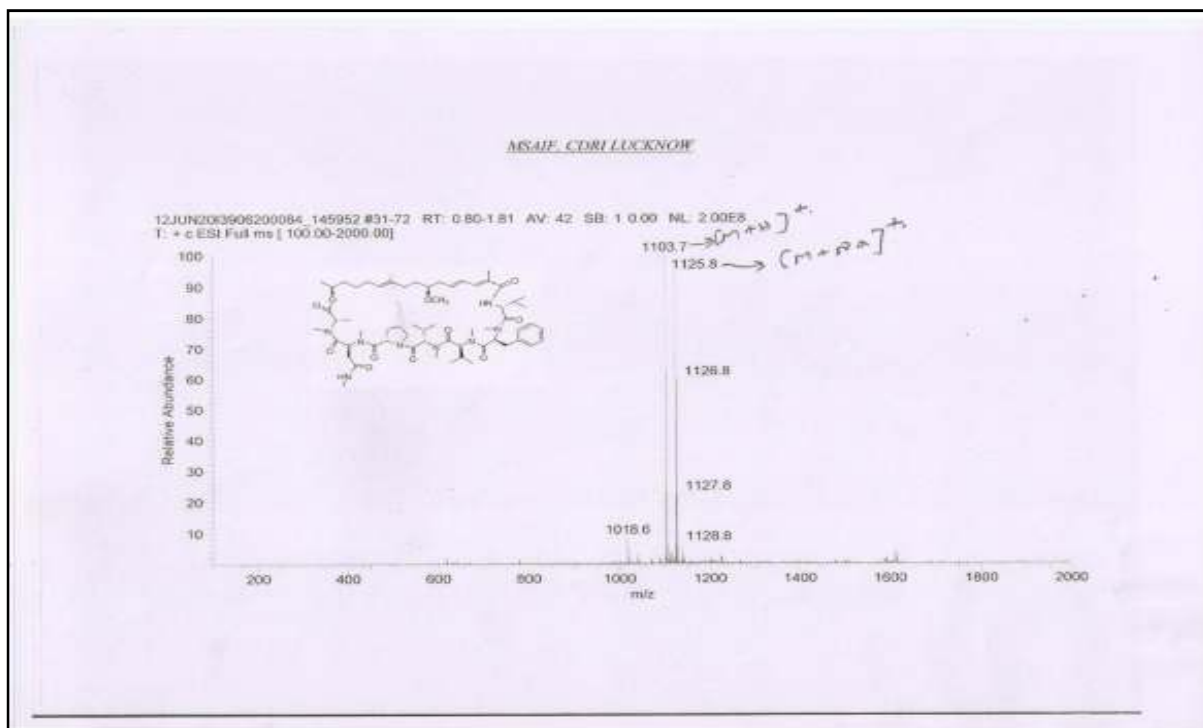

ESI-MS Spectrum of compound 1

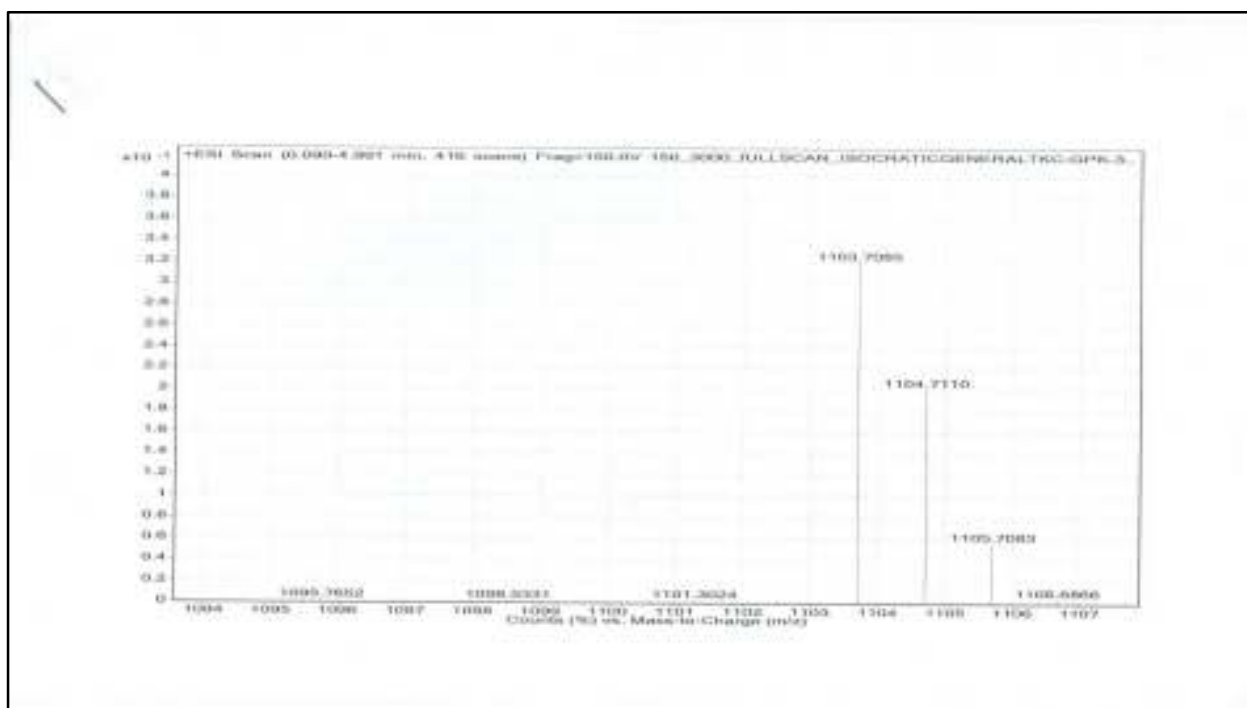

HRMS Spectrum of compound 1

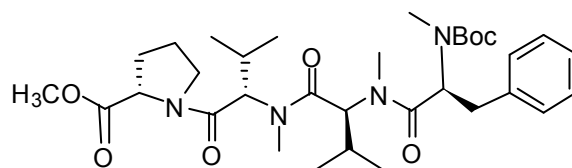

**Tetramer-20**

**Table 1a:** <sup>1</sup>H NMR chemical shift assignments of Tetramer **20** Conformer-1A

| Proton/AA         | Phe1 | Val2            | Val3          | Pro4          |
|-------------------|------|-----------------|---------------|---------------|
| C $\alpha$ H      | 5.15 | 5.13            | 5.08          | 4.48          |
| C $\beta$ H       | 3.05 | 2.37            | 2.31          | 1.92,<br>2.17 |
| C $\gamma$ H      | ---  | 0.848,<br>0.943 | 0.81,<br>0.92 | 2.05          |
| C $\delta$ H      | ---  | ---             | ---           | 3.57,<br>3.74 |
| N-CH <sub>3</sub> | 2.78 | 2.81            | 2.97          | ----          |

Others: Boc=1.18, -OCH<sub>3</sub>=3.67, PheArH=7.17-7.22

**Table 1b:** <sup>1</sup>H NMR chemical shift assignments of Tetramer **20** Conformer-1B

| Proton/AA         | Phe1 | Val2           | Val3           | Pro4            |
|-------------------|------|----------------|----------------|-----------------|
| C $\alpha$ H      | 5.47 | 5.103          | 5.105          | 4.51            |
| C $\beta$ H       | 3.05 | 2.35           | 2.35           | 1.933,<br>2.185 |
| C $\gamma$ H      | ---  | 0.828,<br>0.93 | 0.828,<br>0.93 | 2.05            |
| C $\delta$ H      | ---  | ---            | ---            | 3.57,<br>3.85   |
| N-CH <sub>3</sub> | 2.78 | 2.87           | 3.01           | ----            |

Others: Boc=1.31, -OCH<sub>3</sub>=3.58, PheArH=7.17-7.22

**Table 1c:** <sup>1</sup>H NMR chemical shift assignments of Tetramer **20** Conformer-2A

| Proton/AA         | Phe1            | Val2            | Val3            | Pro4          |
|-------------------|-----------------|-----------------|-----------------|---------------|
| C $\alpha$ H      | 5.007           | 5.05            | 4.75            | 4.76          |
| C $\beta$ H       | 2.904,<br>3.114 | 2.66            | 2.336           | 1.76,<br>2.15 |
| C $\gamma$ H      | ---             | 0.805,<br>0.899 | 0.751,<br>0.927 | 2.05          |
| C $\delta$ H      | ---             | ---             | ---             | 3.40,<br>3.57 |
| N-CH <sub>3</sub> | 2.78            | 3.01            | 2.84            | ----          |

Others: Boc=1.26, -OCH<sub>3</sub>=3.58, PheArH=7.17-7.22

**Table 1d:**  $^1\text{H}$  NMR chemical shift assignments of Tetramer **20** Conformer-2B

| Proton/AA    | Phe1           | Val2            | Val3            | Pro4            |
|--------------|----------------|-----------------|-----------------|-----------------|
| C $\alpha$ H | 5.33           | 5.20            | 4.74            | 4.837           |
| C $\beta$ H  | 2.841,<br>3.24 | 2.83            | 2.336           | 1.786,<br>2.176 |
| C $\gamma$ H | ---            | 0.864,<br>0.947 | 0.805,<br>0.928 | 2.05            |
| C $\delta$ H | ---            | ---             | ---             | 3.43,<br>3.59   |
| N-CH $_3$    | 2.78           | 2.84            | 2.82            | ----            |

Others: Boc=1.40, -OCH $_3$ =3.67, PheArH=7.17-7.22

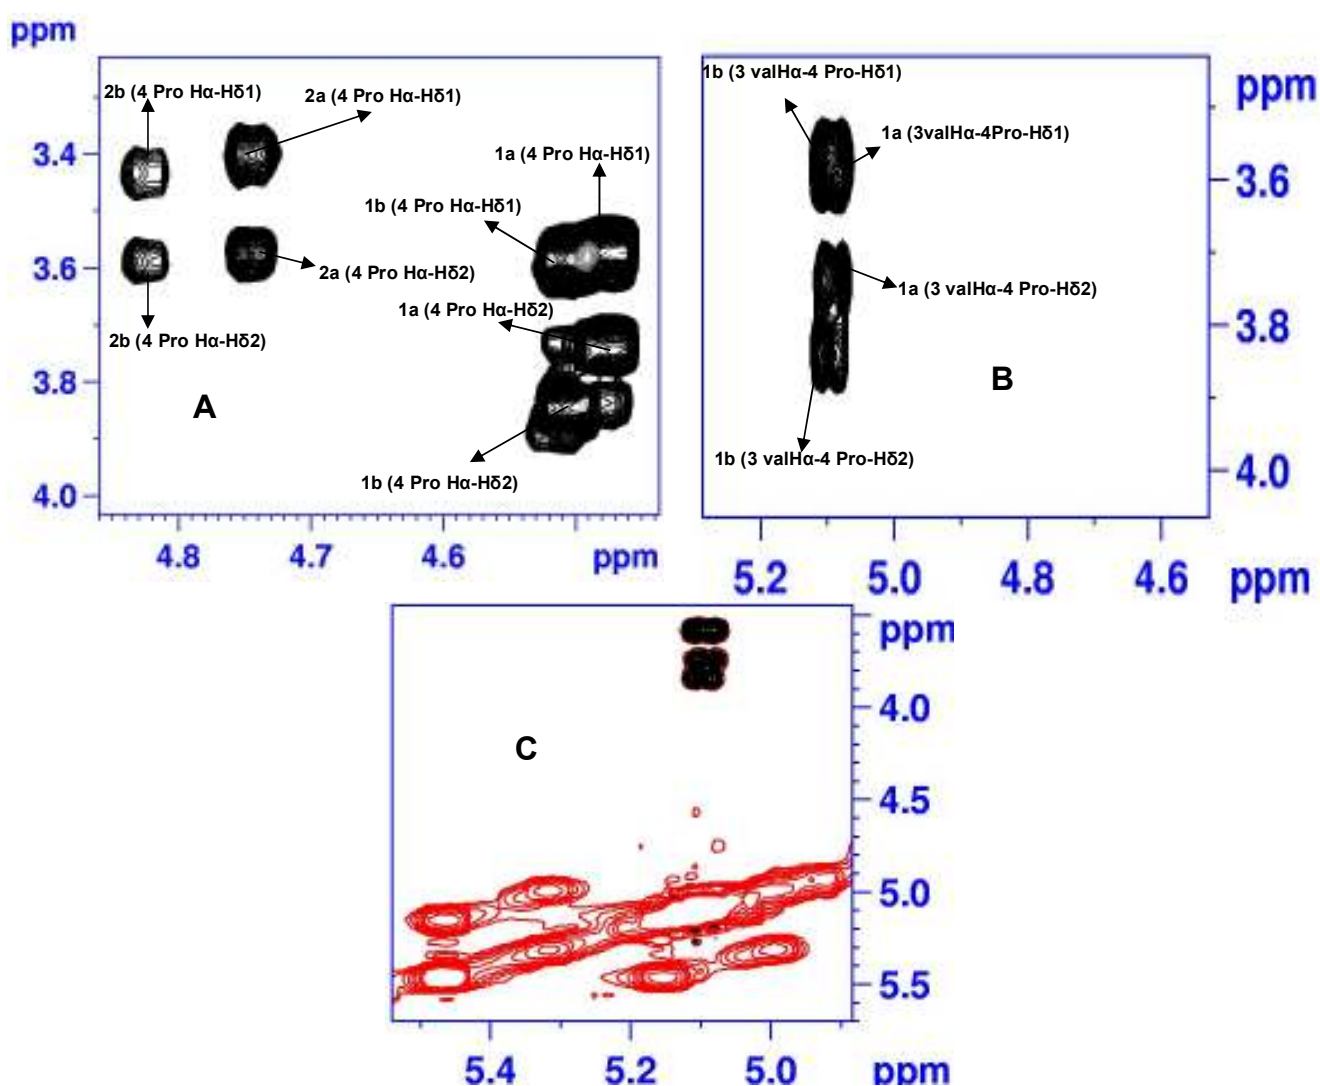

Figure 1: Multiple conformations of compound **20**. A) Four conformations in proline C $\alpha$ H region were found. B) Characteristic nOes in ROESY Experiment shows that proline exists predominantly in *trans* conformation for 1a, 1b and absence of such nOes for 2a, and 2b suggests *cis* configuration for 2a, 2b. C) Exchange peaks in Valine C $\alpha$ H and Phe C $\alpha$ H region.

**Table 2:** <sup>1</sup>H NMR chemical shift assignments of compound **21** (Major conformer)

| Proton/AA         | Phe1          | Val2            | Val3             | Pro4           | Asn5           | Ala6 |
|-------------------|---------------|-----------------|------------------|----------------|----------------|------|
| C $\alpha$ H      | 5.88          | 5.14            | 5.003            | 4.68           | 5.38           | 4.46 |
| C $\beta$ H       | 3.08,<br>2.65 | 2.301           | 2.22             | 2.12,<br>1.89  | 2.357,<br>2.76 | 1.35 |
| C $\gamma$ H      | ---           | 0.783,<br>0.877 | 0.7971,<br>0.861 | 2.05           | ----           | ---  |
| C $\delta$ H      | ---           | ---             | ---              | 3.51,<br>3.575 | ---            | ---  |
| N-CH <sub>3</sub> | 2.81          | 2.83            | 2.78             | ----           | 2.764,         | 2.75 |

Others: Boc=1.30, -OCH<sub>3</sub>=3.66, PheArH= 7.10-7.24, NH= 5.82, AsnNH-CH<sub>3</sub>= 2.81

**Table 3:** <sup>1</sup>H NMR chemical shift assignments of compound **24** (Major conformer)

| Proton/AA         | Val1            | Phe2            | Val3            | Val4            | Pro5            | Asn6            | Ala7 |
|-------------------|-----------------|-----------------|-----------------|-----------------|-----------------|-----------------|------|
| NH                | 5.082           | ---             | ---             | ---             | ---             | ---             | ---  |
| C $\alpha$ H      | 4.28            | 5.93            | 5.13            | 5.095           | 4.743           | 5.42            | 4.63 |
| C $\beta$ H       | 2.269           | 2.710,<br>3.161 | 2.347           | 2.320           | 1.97,<br>2.175  | 2.368,<br>2.859 | 1.43 |
| C $\gamma$ H      | 0.808,<br>0.920 | ---             | 0.820,<br>0.919 | 0.825,<br>0.927 | 2.05            | ---             | ---  |
| C $\delta$ H      | ---             | ---             | ---             | ---             | 3.657,<br>3.705 | ---             | ---  |
| N-CH <sub>3</sub> | 2.83            | 2.81            | 2.84            | 2.80            | ----            | 2.98            | 2.97 |

Others: Boc=1.31, -OCH<sub>3</sub>=3.59, PheArH= 7.14-7.24, NH= 5.81, AsnNH-CH<sub>3</sub>= 2.81

**Table 6:** <sup>1</sup>H NMR chemical shift assignments of compound **25** (Major conformer)

| Proton/AA         | Val1                                                                                                                                                                                                                                                                                                                                                                                                                                     | Phe1          | Val2          | Val3          | Pro4          | Asn5          | Ala6 |
|-------------------|------------------------------------------------------------------------------------------------------------------------------------------------------------------------------------------------------------------------------------------------------------------------------------------------------------------------------------------------------------------------------------------------------------------------------------------|---------------|---------------|---------------|---------------|---------------|------|
| C $\alpha$ H      | 4.78                                                                                                                                                                                                                                                                                                                                                                                                                                     | 5.98          | 5.09          | 5.11          | 4.74          | 5.83          | 4.75 |
| C $\beta$ H       | 2.36                                                                                                                                                                                                                                                                                                                                                                                                                                     | 3.24,<br>2.71 | 2.34          | 2.31          | 1.95,<br>2.17 | 2.37,<br>2.75 | 1.40 |
| C $\gamma$ H      | 0.81,<br>0.72                                                                                                                                                                                                                                                                                                                                                                                                                            | ---           | 0.82,<br>0.93 | 0.81,<br>0.92 | 2.04          | ----          | ---  |
| C $\delta$ H      | ----                                                                                                                                                                                                                                                                                                                                                                                                                                     | ---           | ---           | ---           | 3.65,<br>3.71 | ---           | ---  |
| N-CH <sub>3</sub> | ----                                                                                                                                                                                                                                                                                                                                                                                                                                     | 3.01          | 3.01          | 2.96          | ----          | 2.93,<br>2.73 | 2.91 |
| NH                | 6.34                                                                                                                                                                                                                                                                                                                                                                                                                                     | ----          | ----          | ----          | ----          | 5.68          | ---- |
| DTA/others        | C <sub>24</sub> H= 1.93, C <sub>25</sub> H=6.81, C <sub>26</sub> H=6.33, C <sub>27</sub> H=6.09, C <sub>32</sub> H=5.40, C <sub>33</sub> H=5.36,<br>C <sub>29</sub> H=3.25, C <sub>28</sub> H=2.37,2.32, C <sub>31</sub> H=2.02, C <sub>34</sub> H=1.93, C <sub>36</sub> H=1.51,1.42,<br>C <sub>30</sub> H=1.60,1.58, C <sub>35</sub> H=1.25, C <sub>37</sub> H=4.77,1.26,<br>C <sub>29</sub> -OCH <sub>3</sub> =3.36, PheArH=7.13-7.26. |               |               |               |               |               |      |

**Table 8.** Comparison of NMR Assignments of Maleamide E with synthetic compound **1** (Major conformer) in CDCl<sub>3</sub>

| Position | <sup>1</sup> H | Compound    |                 | Compound                        |
|----------|----------------|-------------|-----------------|---------------------------------|
|          | (natural)      | (synthetic) | <sup>13</sup> C | ( <b>1</b> )<br><sup>13</sup> C |
|          |                |             | (natural)       | (synthetic)                     |
| 2        |                |             | 170.7           | 169.1                           |
| 3        | 4.87           | 4.90        | 55.6            | 57.6                            |
| 3a       | 1.48           | 1.54        | 16.0            | 14.4                            |
| 4a       | 2.78           | 2.94        | 29.8            | 30.4                            |
| 5        |                |             | 169.3           | 168.5                           |
| 6        | 5.87           | 5.93        | 49.1            | 51.5                            |
| 6a       | 2.98,2.39      | 3.03,2.27   | 35.6            | 36.1                            |
| 6b       |                |             | 170.2           | 169.4                           |
| 6c       | 5.61           | 5.45        |                 |                                 |
| 6d       | 2.75           | 2.76        | 26.3            | 26.6                            |
| 7a       | 2.95           | 2.84        | 30.2            | 30.4                            |
| 8        |                |             | 171.0           | 169.5                           |
| 9        | 4.72           | 4.77        | 57.1            | 56.7                            |
| 9a       | 2.01,1.71      | 2.19,1.86   | 28.3            | 28.5                            |
| 9b       | 1.75,1.85      | 2.06        | 24.6            | 24.8                            |
| 9c       | 3.58,3.77      | 3.67        | 47.3            | 47.6                            |
| 11       |                |             | 168.6           | 168.2                           |
| 12       | 4.89           | 4.94        | 59.8            | 59.1                            |
| 12a      | 2.09           | 2.37        | 27.0            | 26.3                            |
| 12b      | 0.50           | 0.83        | 18.0            | 16.8                            |
| 12c      | 0.93           | 0.93        | 19.7            | 18.1                            |
| 13a      | 2.66           | 2.81        | 30.1            | 29.7                            |
| 14       |                |             | 170.3           | 169.8                           |
| 15       | 5.01           | 5.01        | 58.5            | 59.4                            |
| 15a      | 2.17           | 2.27        | 27.5            | 27.1                            |
| 15b      | 0.77           | 0.78        | 18.3            | 18.8                            |
| 15c      | 0.78           | 0.87        | 19.5            | 19.8                            |
| 16a      | 2.68           | 2.79        | 29.6            | 29.9                            |
| 17       |                |             | 169.2           | 168.9                           |
| 18       | 5.76           | 5.80        | 54.9            | 54.5                            |
| 18a      | 2.83,3.28      | 2.83,3.28   | 35.5            | 35.8                            |
| 18b      |                |             | 136.9           | 136.4                           |
| 18c,e'   | 7.25           | 7.24        | 129.6           | 129.5                           |
| 18d,d'   | 7.20           | 7.23        | 128.3           | 128.3                           |
| 18e      | 7.14           | 7.20        | 126.6           | 126.9                           |
| 19a      | 3.13           | 2.71        | 30.8            | 30.4                            |
| 20       |                |             | 172.7           | 168.3                           |
| 21       | 4.68           | 4.82        | 54.8            | 53.9                            |
| 21a      | 1.94           | 1.82        | 30.5            | 30.9                            |
| 21b      | 0.68           | 0.69        | 18.9            | 18.4                            |
| 21c      | 0.90           | 0.87        | 18.5            | 18.8                            |
| 22       | 6.02           | 6.37        |                 |                                 |
| 23       |                |             | 169.2           | 169.1                           |
| 24       |                |             | 127.8           | 127.5                           |
| 24a      | 1.88           | 1.94        | 12.7            | 13.1                            |
| 25       | 6.73           | 6.79        | 134.6           | 133.6                           |
| 26       | 6.30           | 6.35        | 127.5           | 128.2                           |
| 27       | 5.96           | 5.97        | 137.5           | 137.3                           |
| 28       | 2.48,2.31      | 2.41,2.36   | 36.8            | 36.6                            |
| 29       | 3.25           | 3.26        | 79.6            | 79.8                            |
| 29a      | 3.35           | 3.36        | 56.8            | 56.7                            |
| 30       | 1.47,1.53      | 1.47,1.53   | 34.1            | 33.6                            |
| 31       | 2.05           | 2.02        | 29.3            | 30.6                            |
| 32       | 5.39           | 5.39        | 130.7           | 13.3                            |
| 33       | 5.37           | 5.35        | 130.1           | 129.9                           |
| 34       | 1.95           | 1.98        | 32.8            | 32.4                            |
| 35       | 1.27           | 1.32        | 26.2            | 25.9                            |
| 36       | 1.44,1.52      | 1.37,1.49   | 35.3            | 35.4                            |
| 37       | 4.78           | 4.79        | 72.7            | 72.8                            |
| 37a'     | 1.19           | 1.20        | 19.7            | 19.9                            |

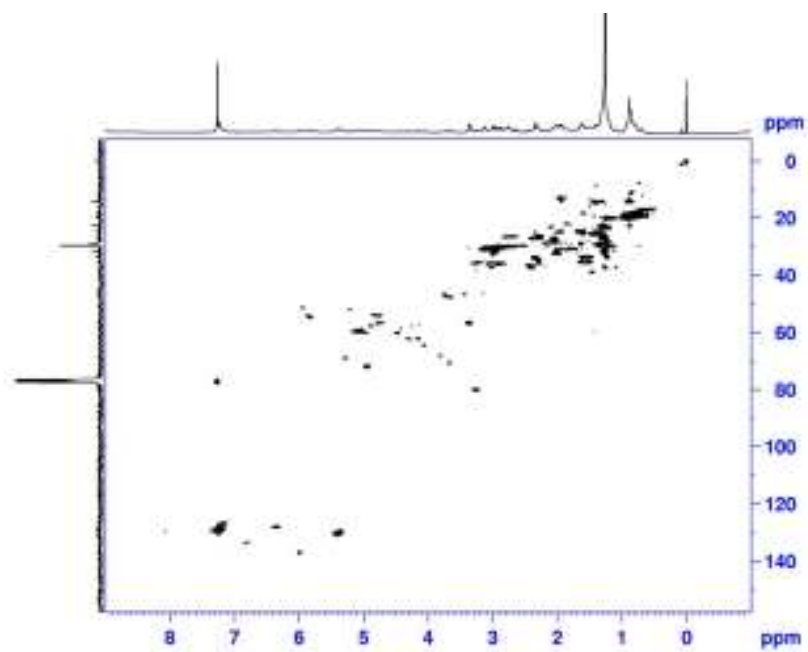

2D-HSQC spectra of Compound 1

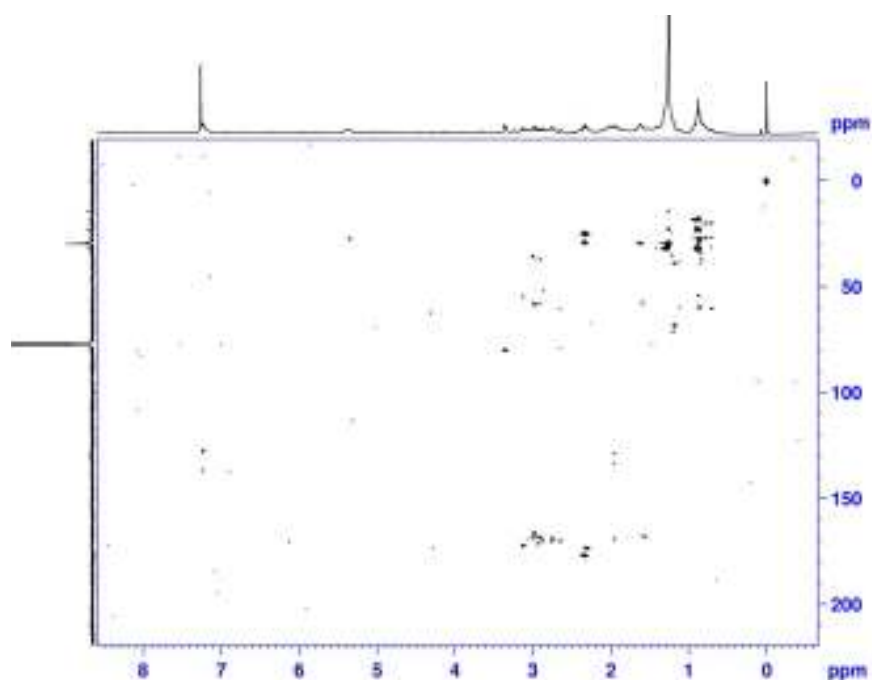

2D-HMBC spectra of Compound 1

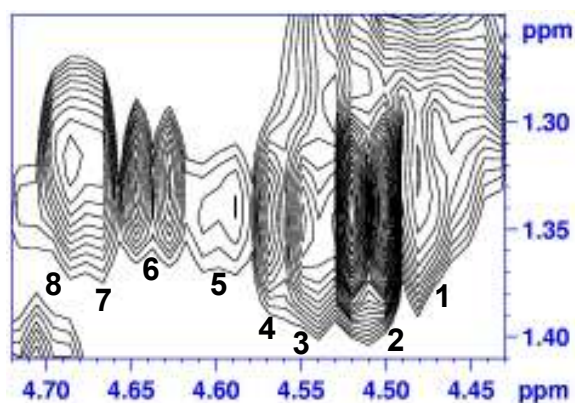

Figure 2: TOCSY expansion of **21**, Ala-C $\alpha$ H-C $\beta$ H region, suggests at least 8 conformations.

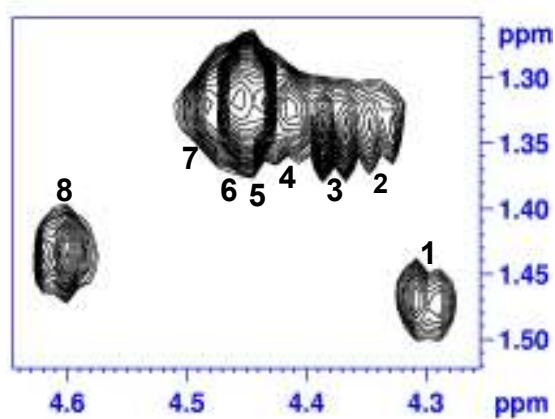

Figure 3: TOCSY expansion of **24**, Ala-C $\alpha$ H-C $\beta$ H region.

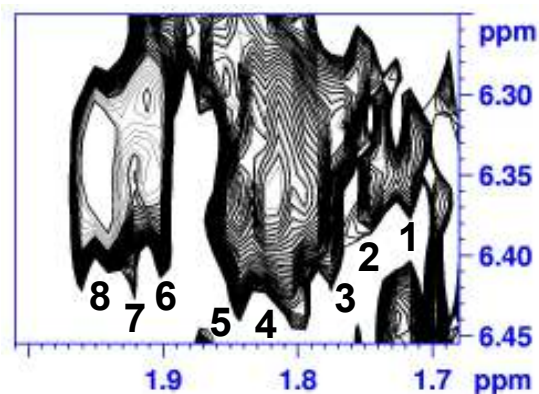

Figure 4: TOCSY expansion of compound **1**, Val NH-C $\beta$ H region.



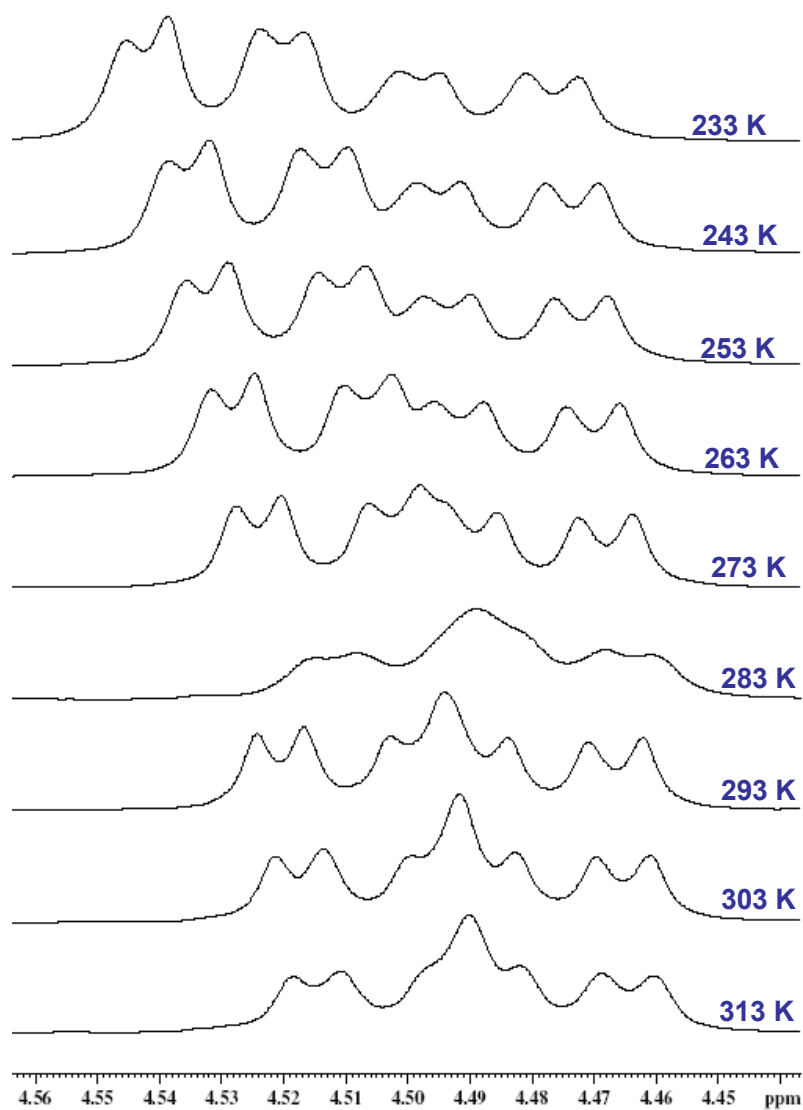

Figure 5: VT study of tetramer **20**

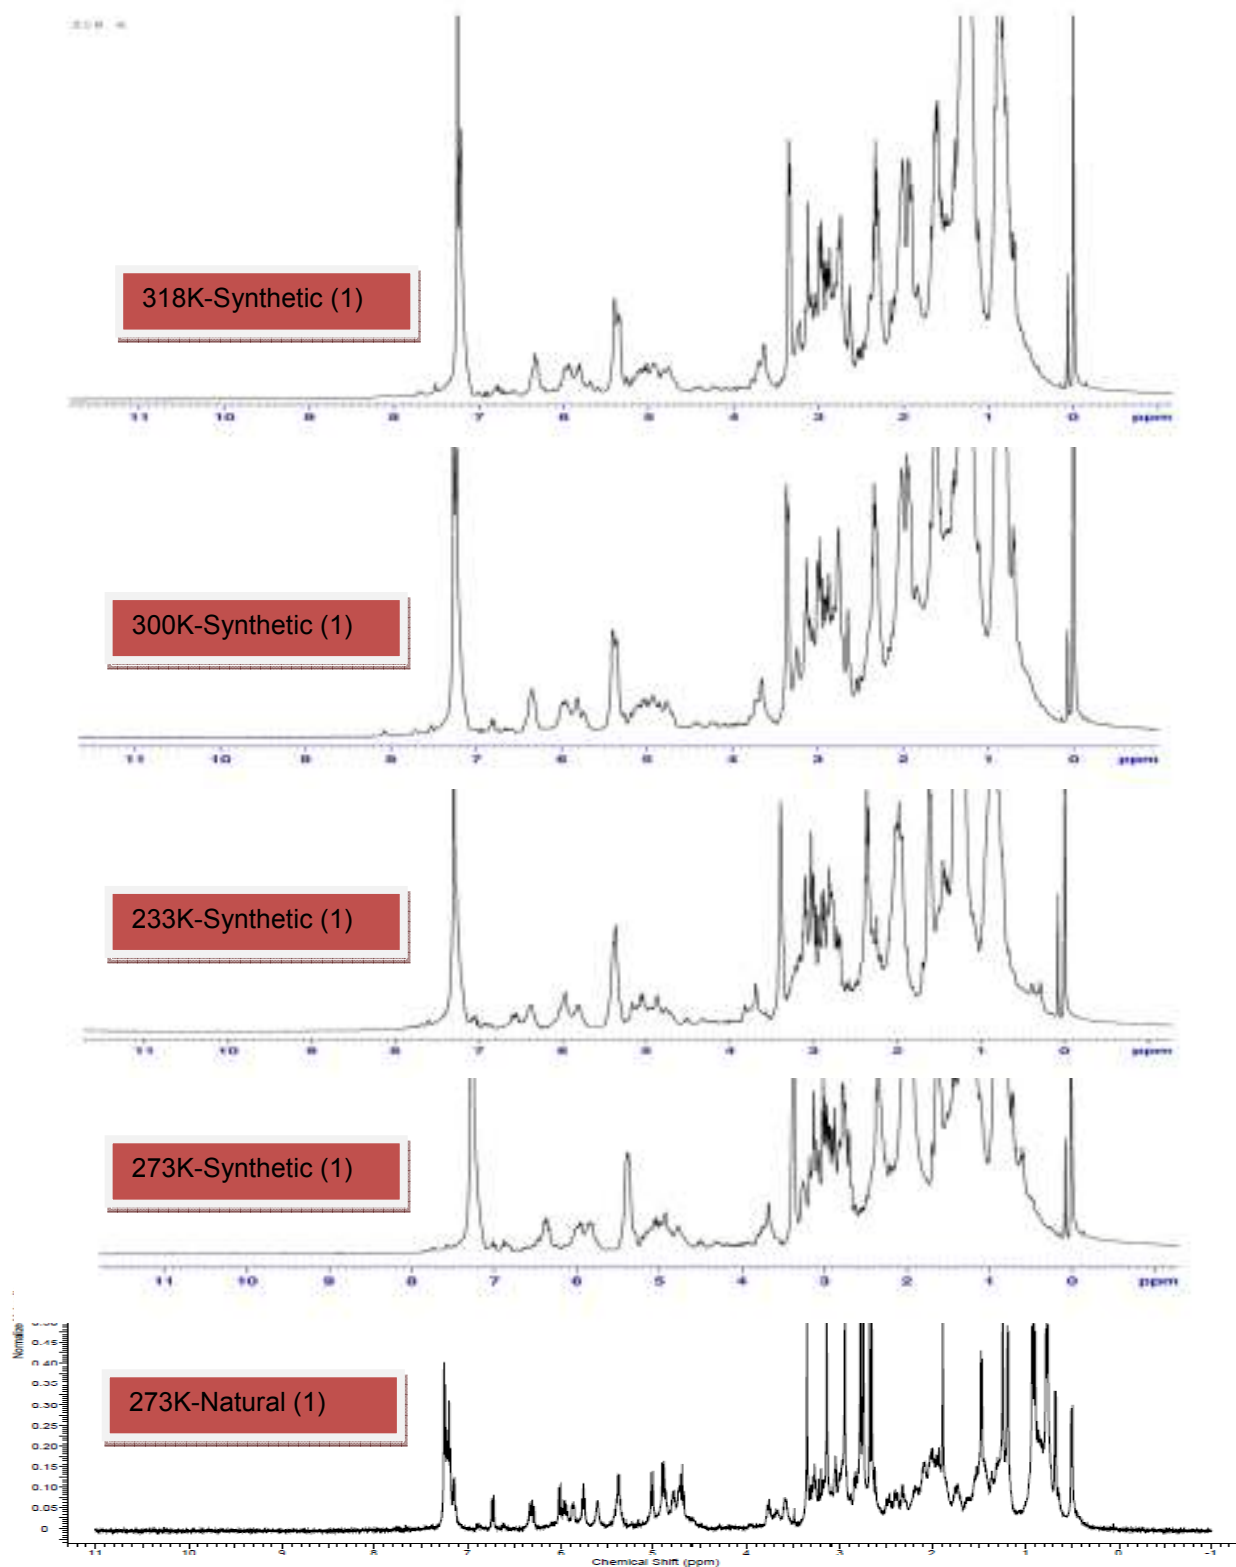

Figure 6: Comparison of compound of 1 at variable temperature with natural compound in CDCl<sub>3</sub>

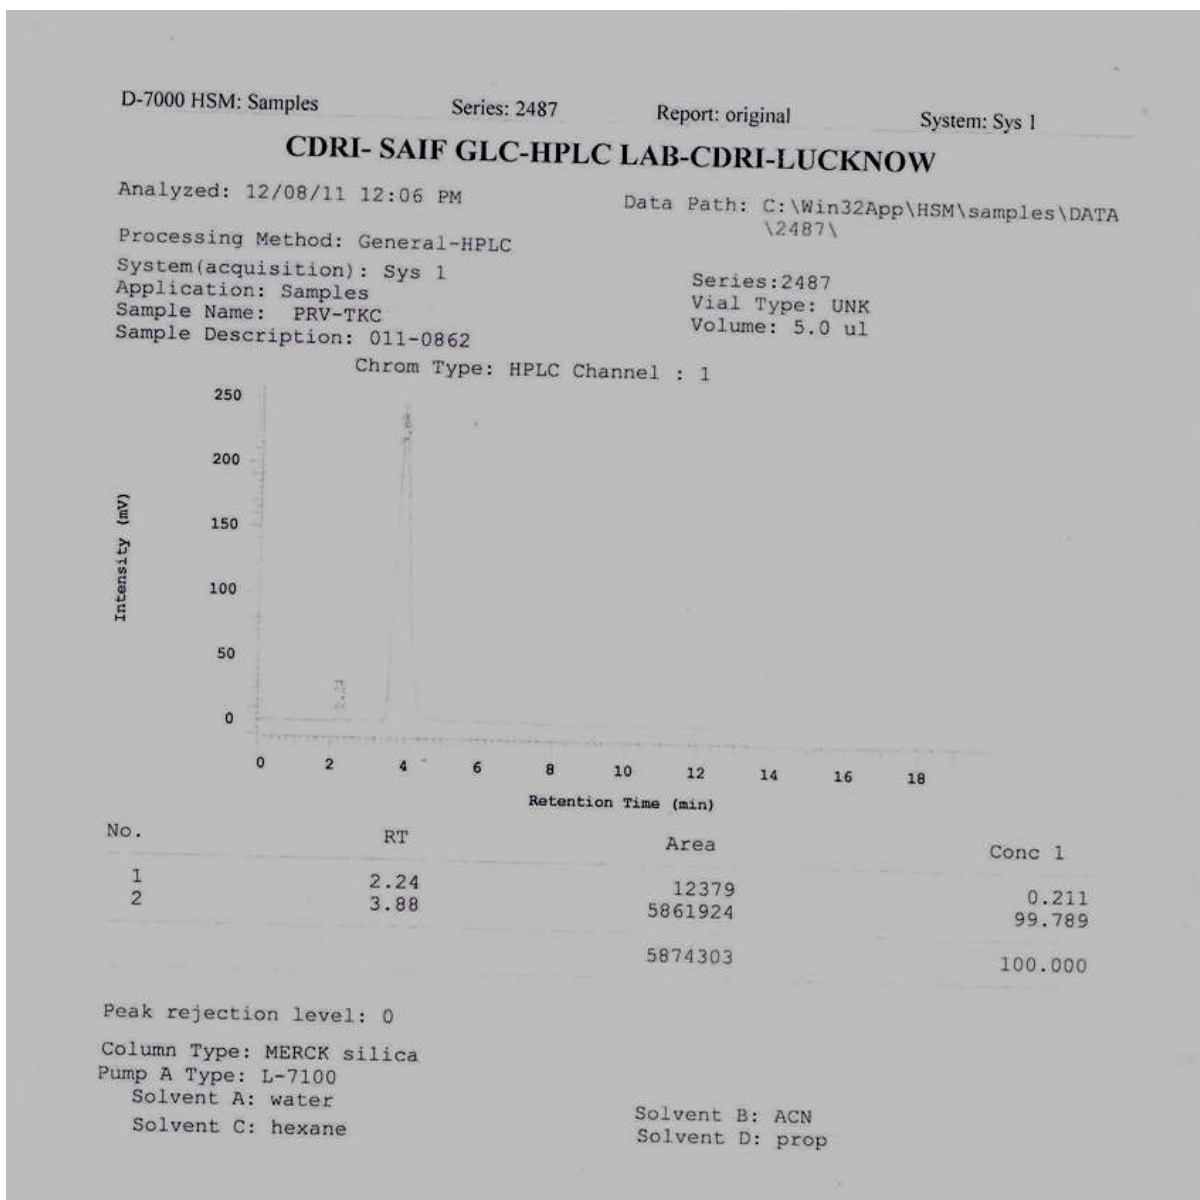

HPLC Spectrum of compound 1
